# Supplementary material
Source: publisher figshare collection journal article supplement (https://tandf.figshare.com/ndownloader/files/14354174)

**This document contains supplementary material for the article, “Makerspaces on Social Media: Shaping Access to Open Design” by Maria Menendez-Blanco & Pernille Bjørn, published in *Human-Computer Interaction*.**

**<Makerspaces on Social Media**

- **Brainstorm Cards>**


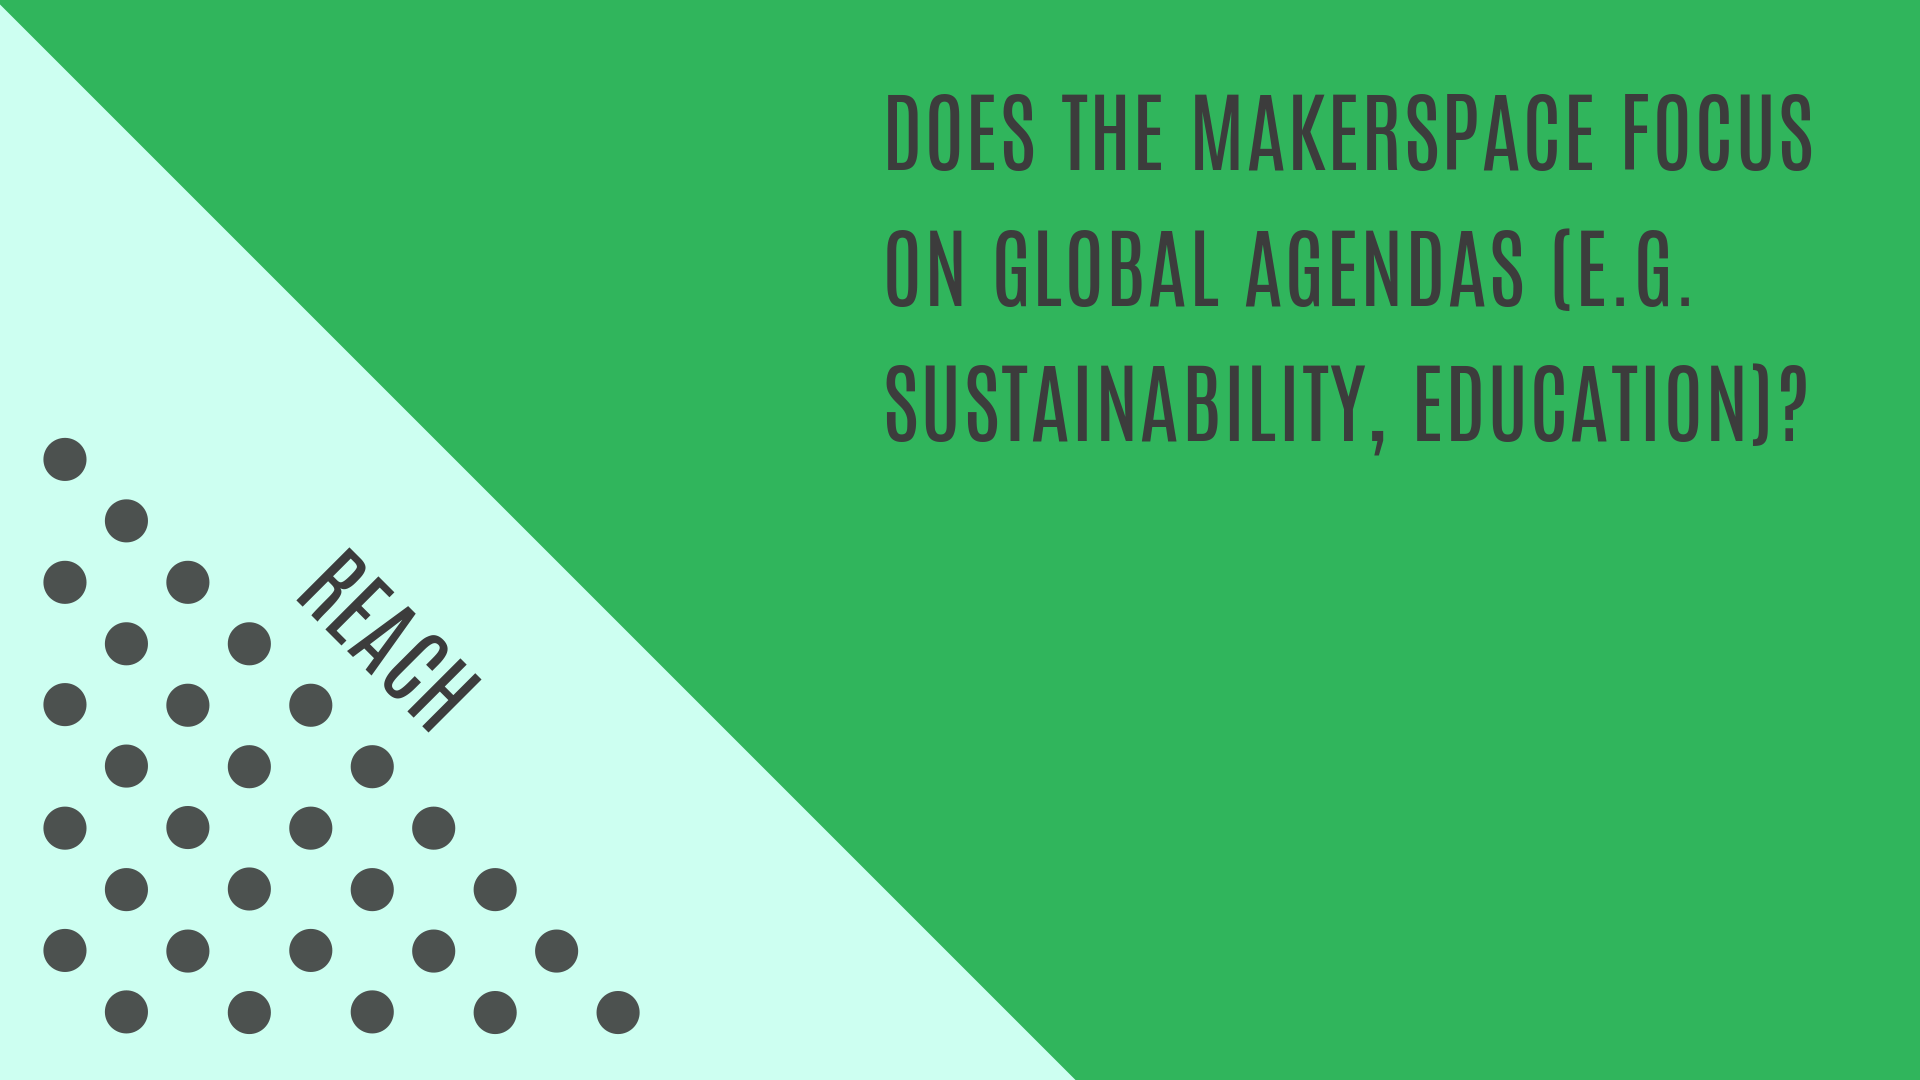

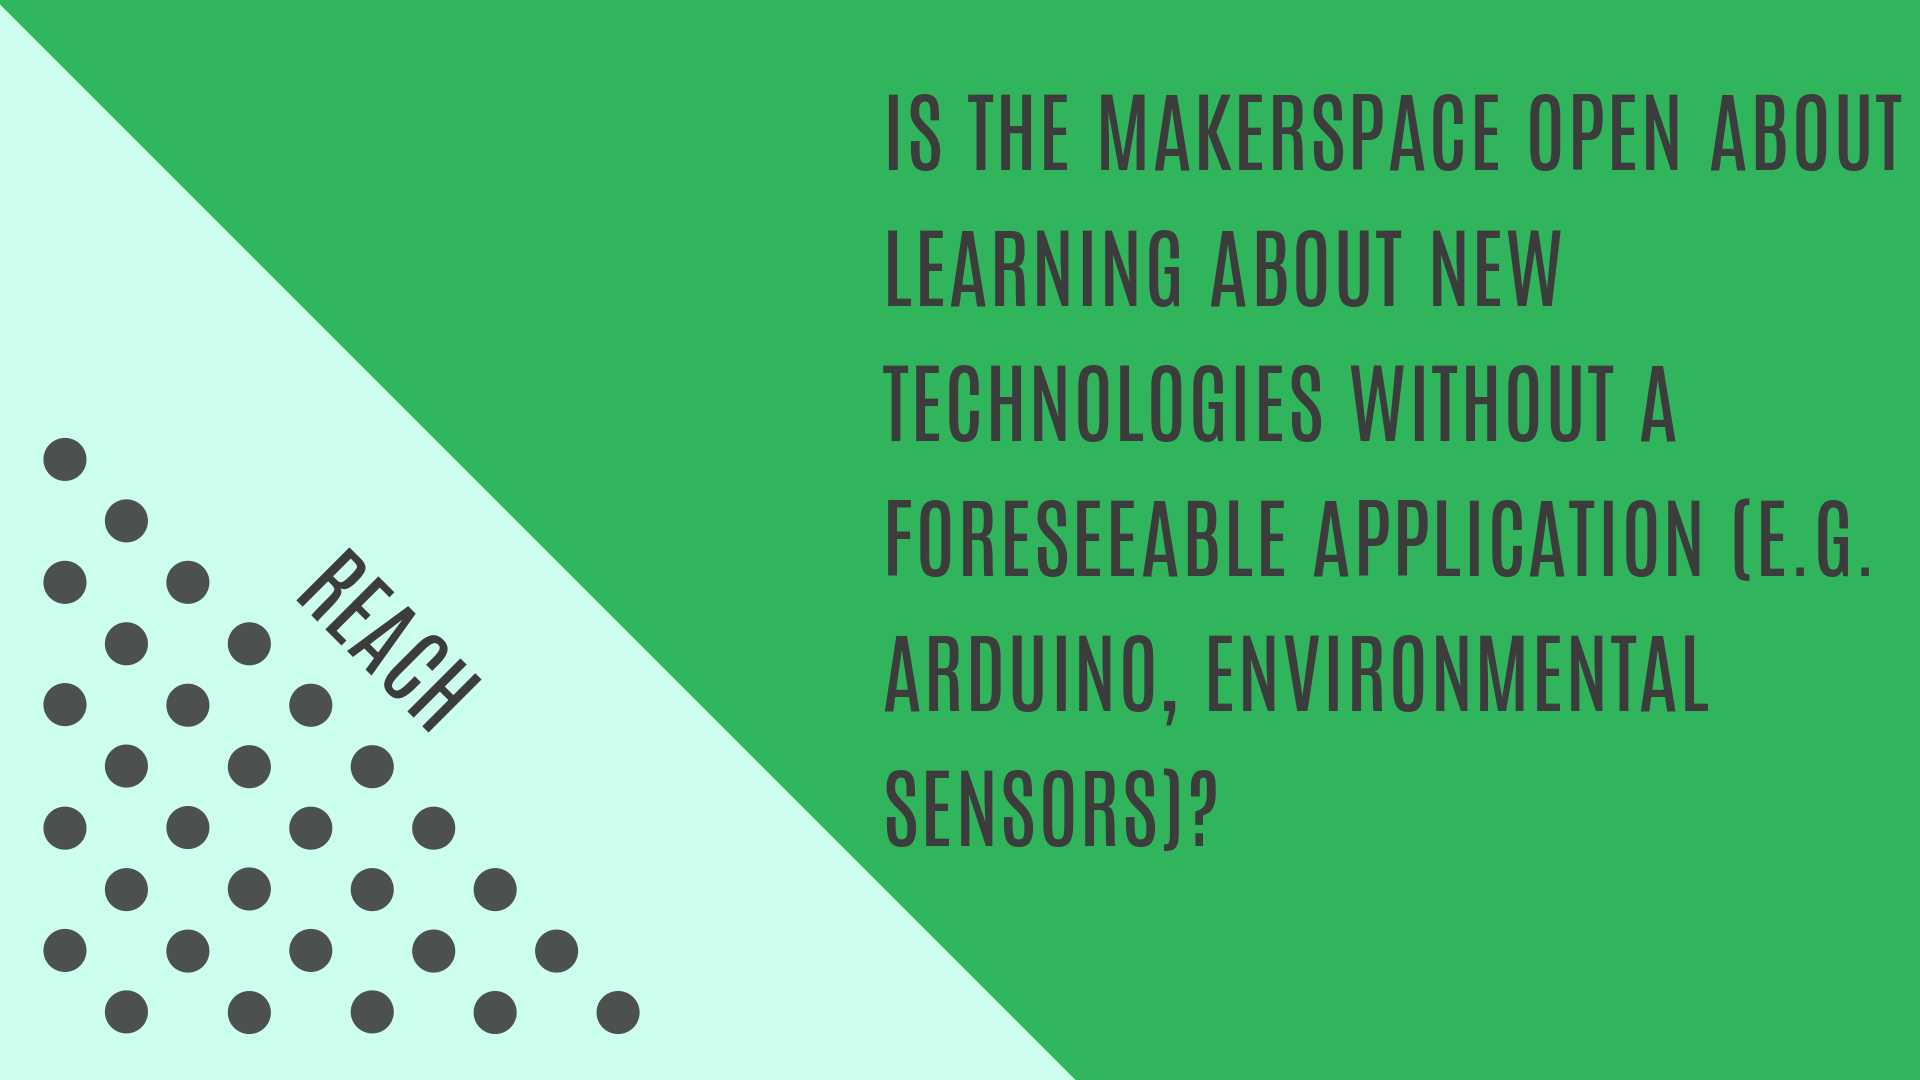


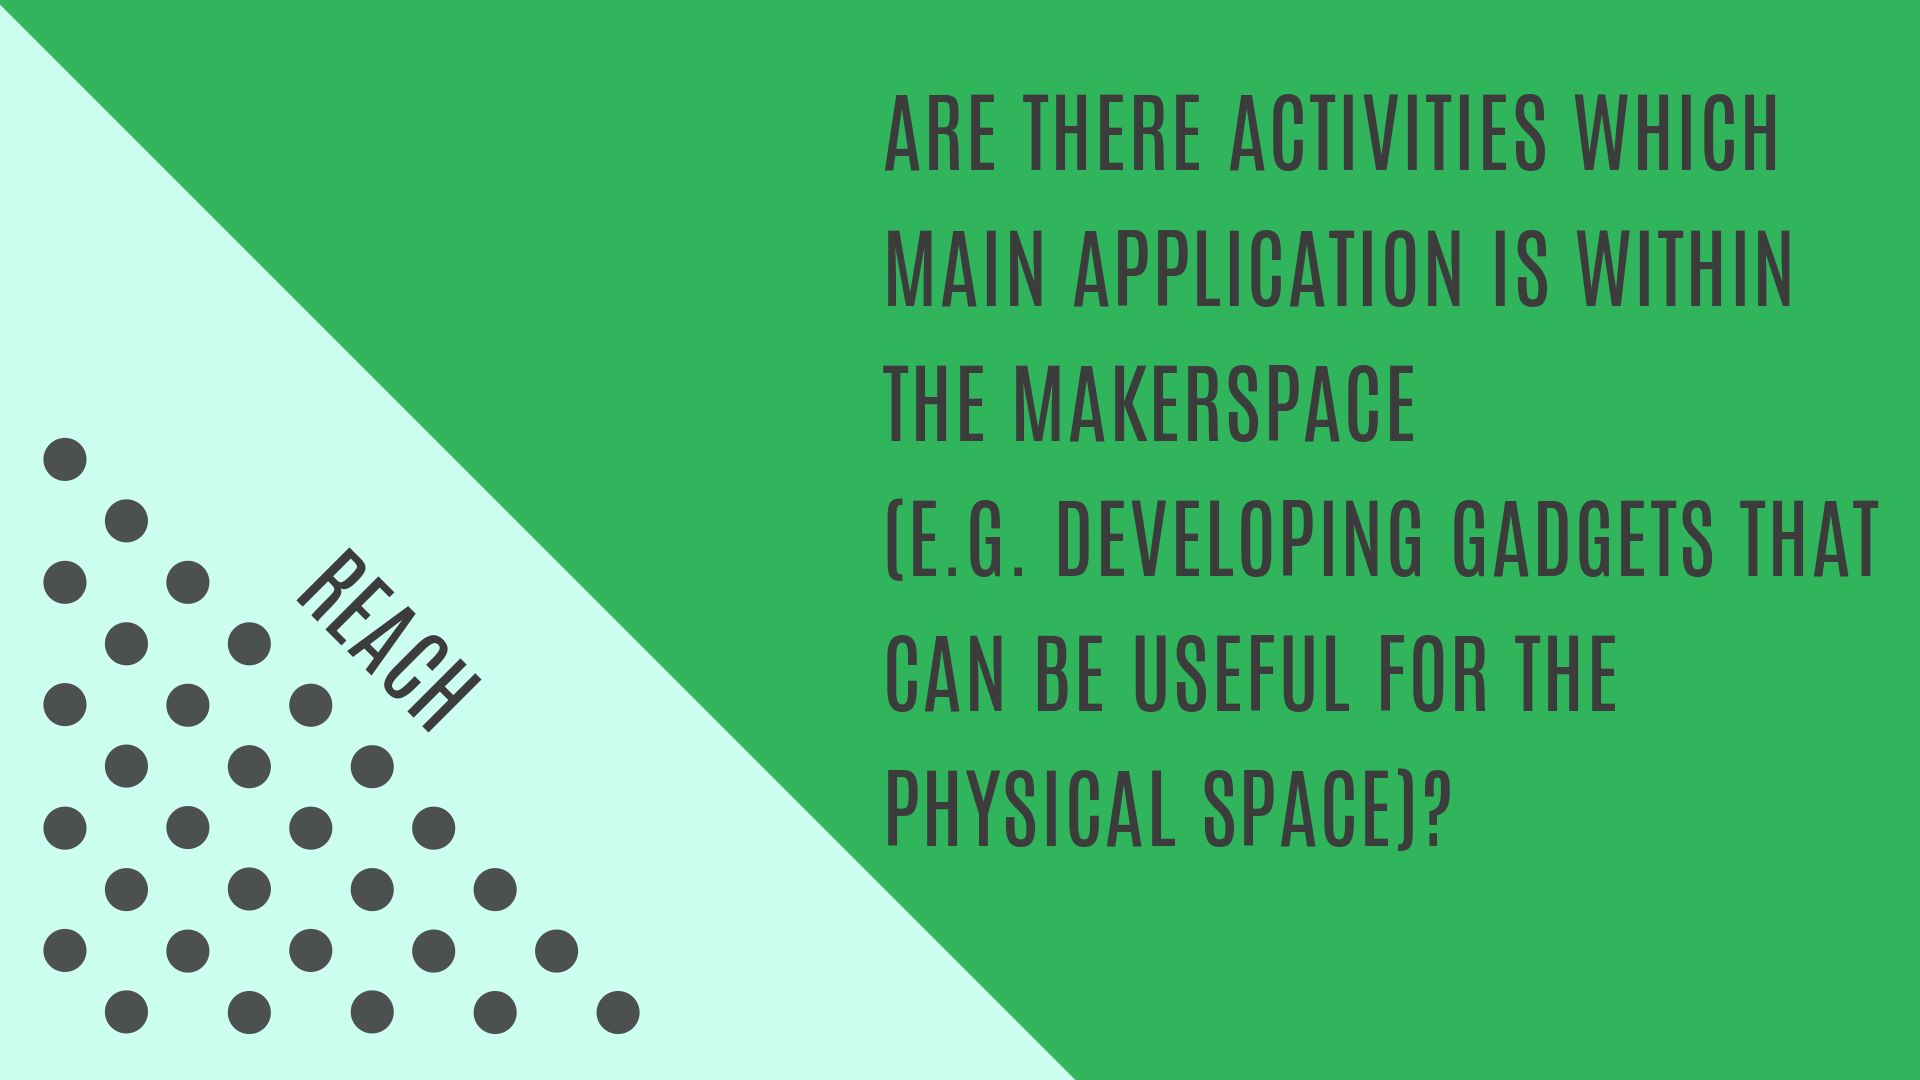

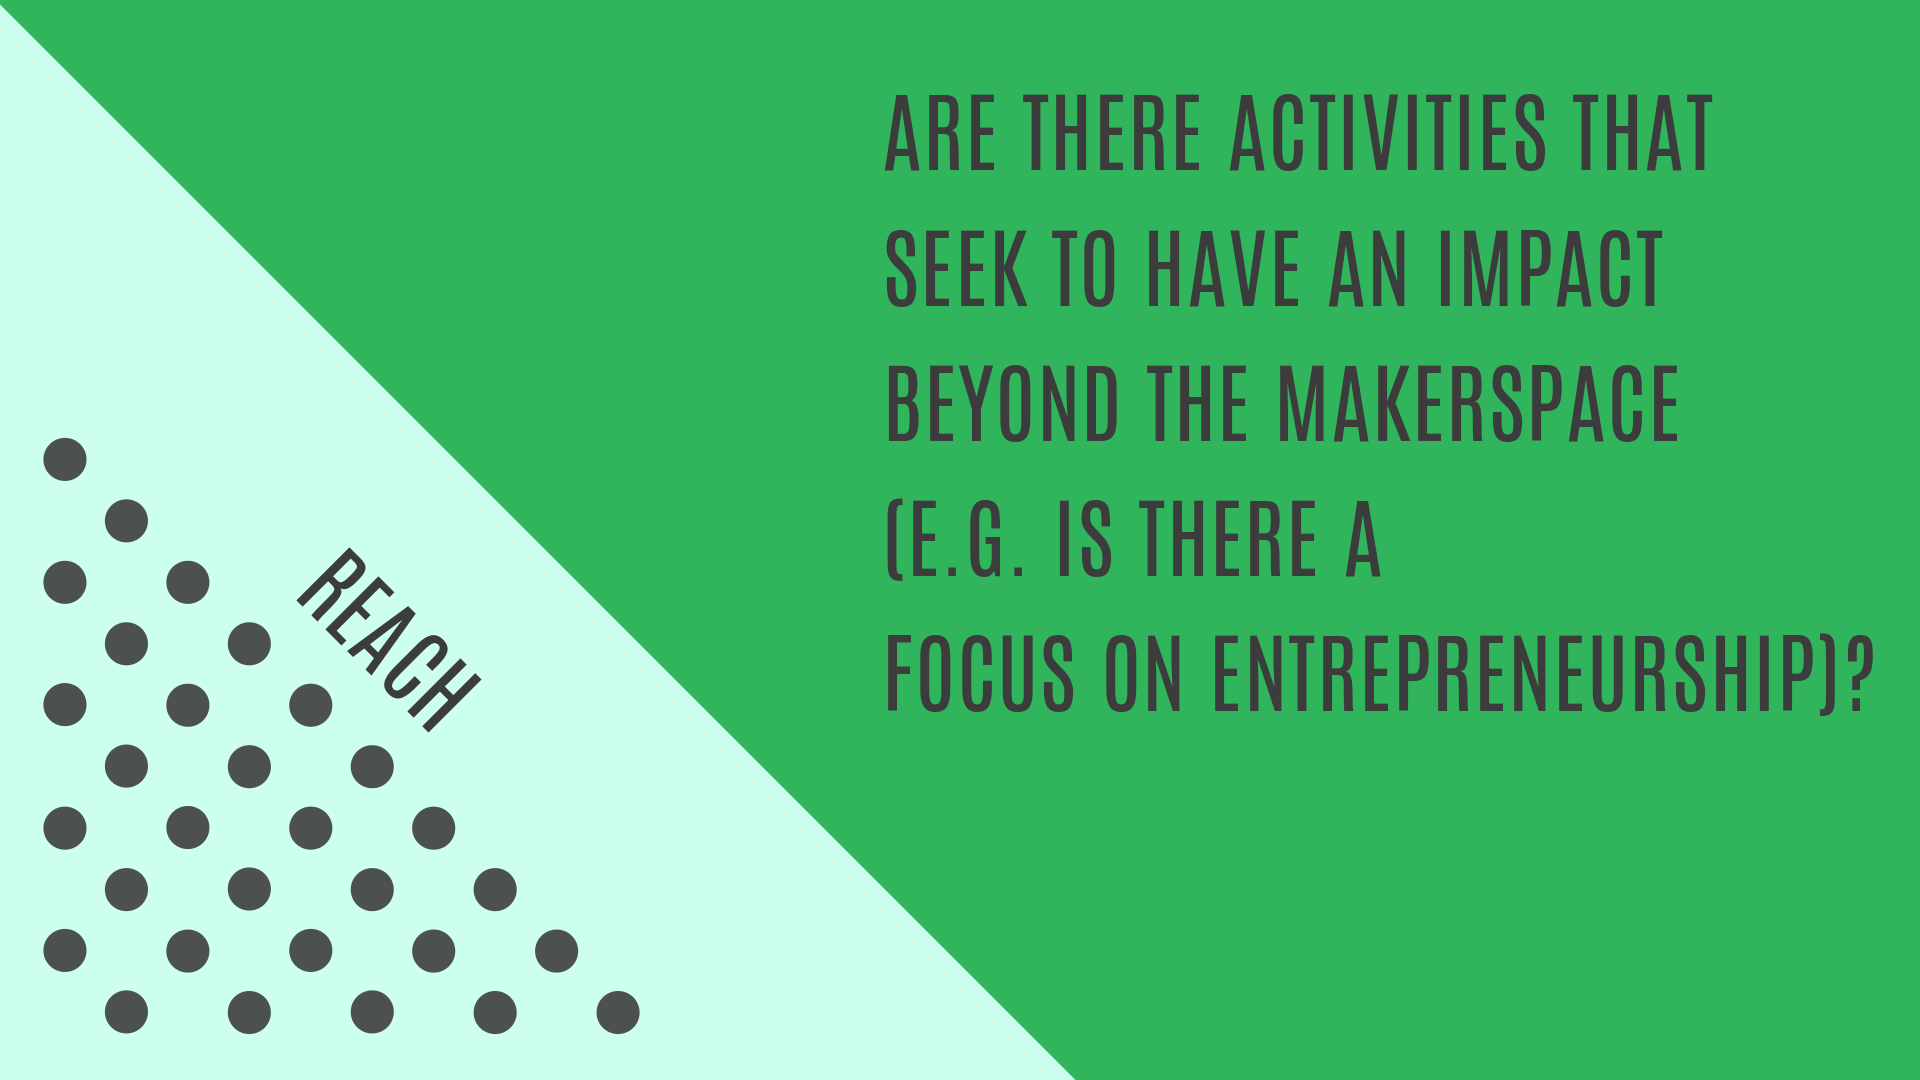


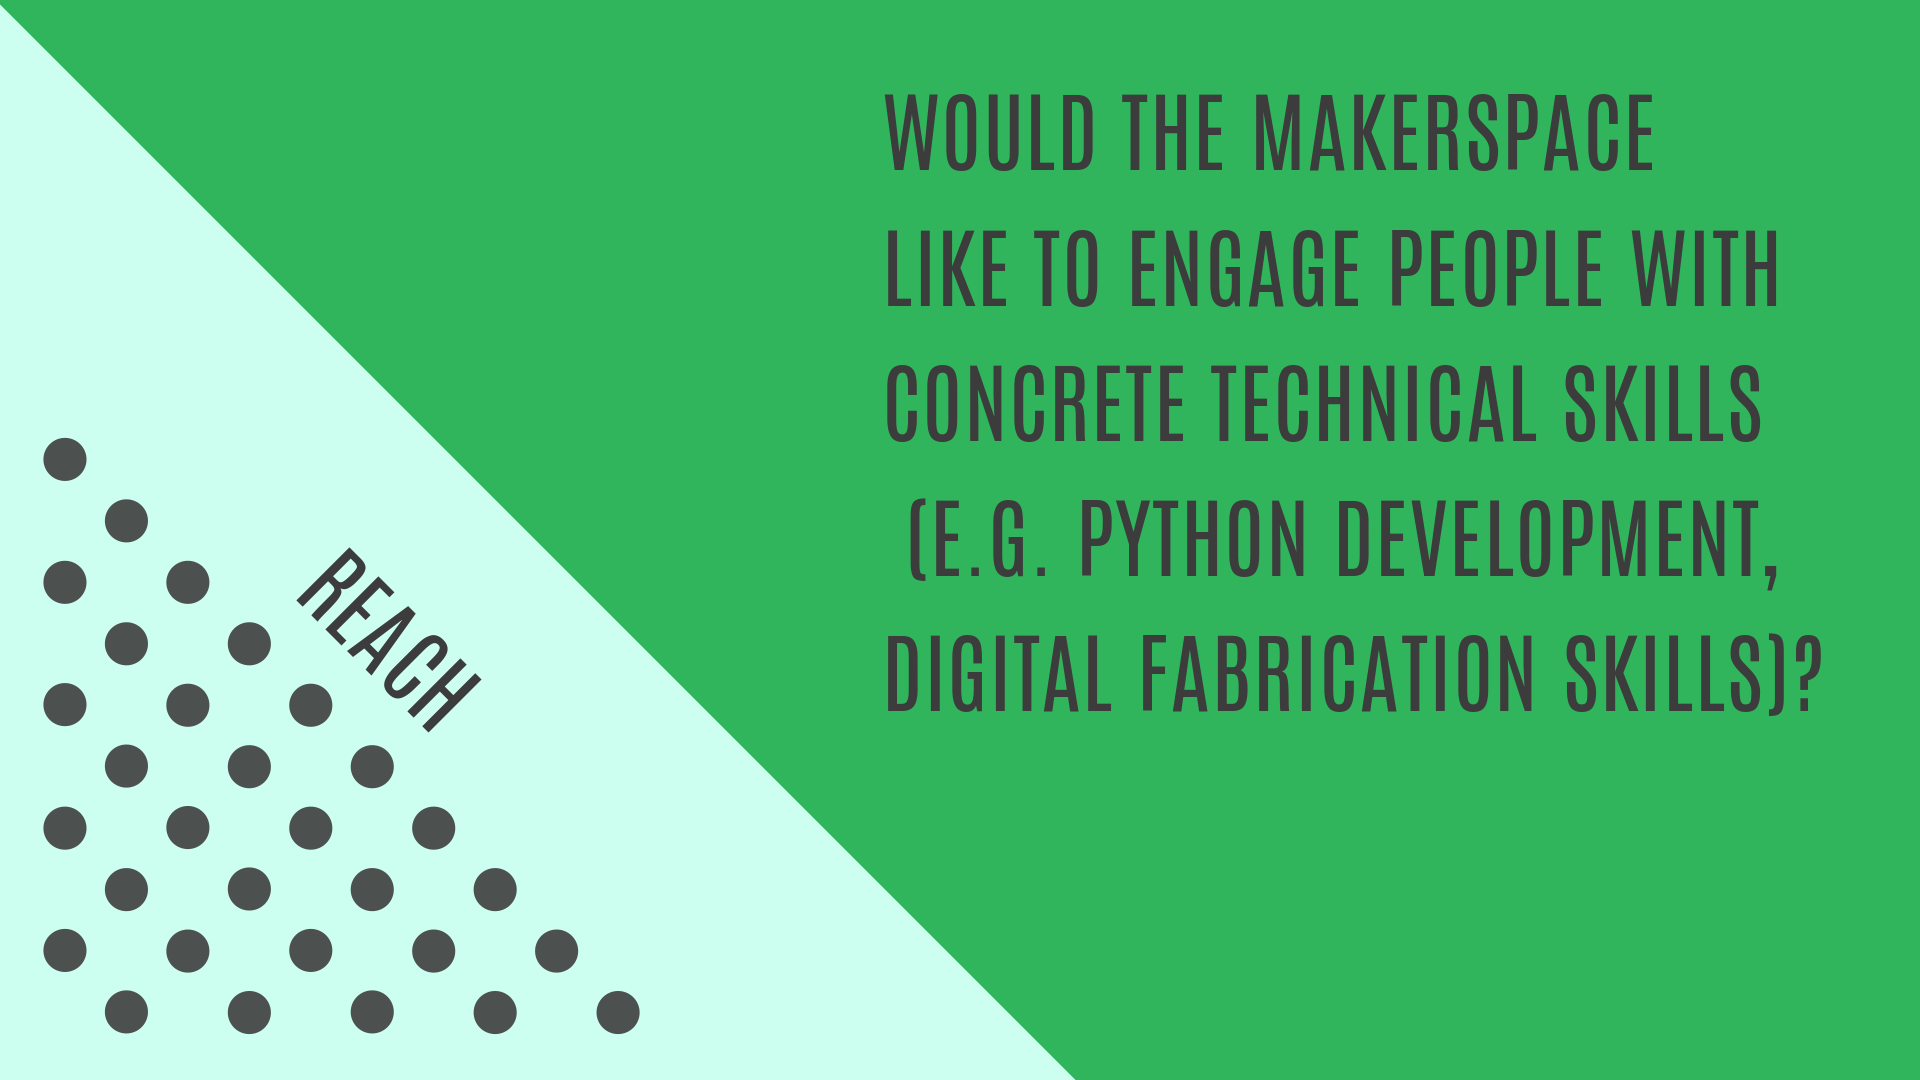

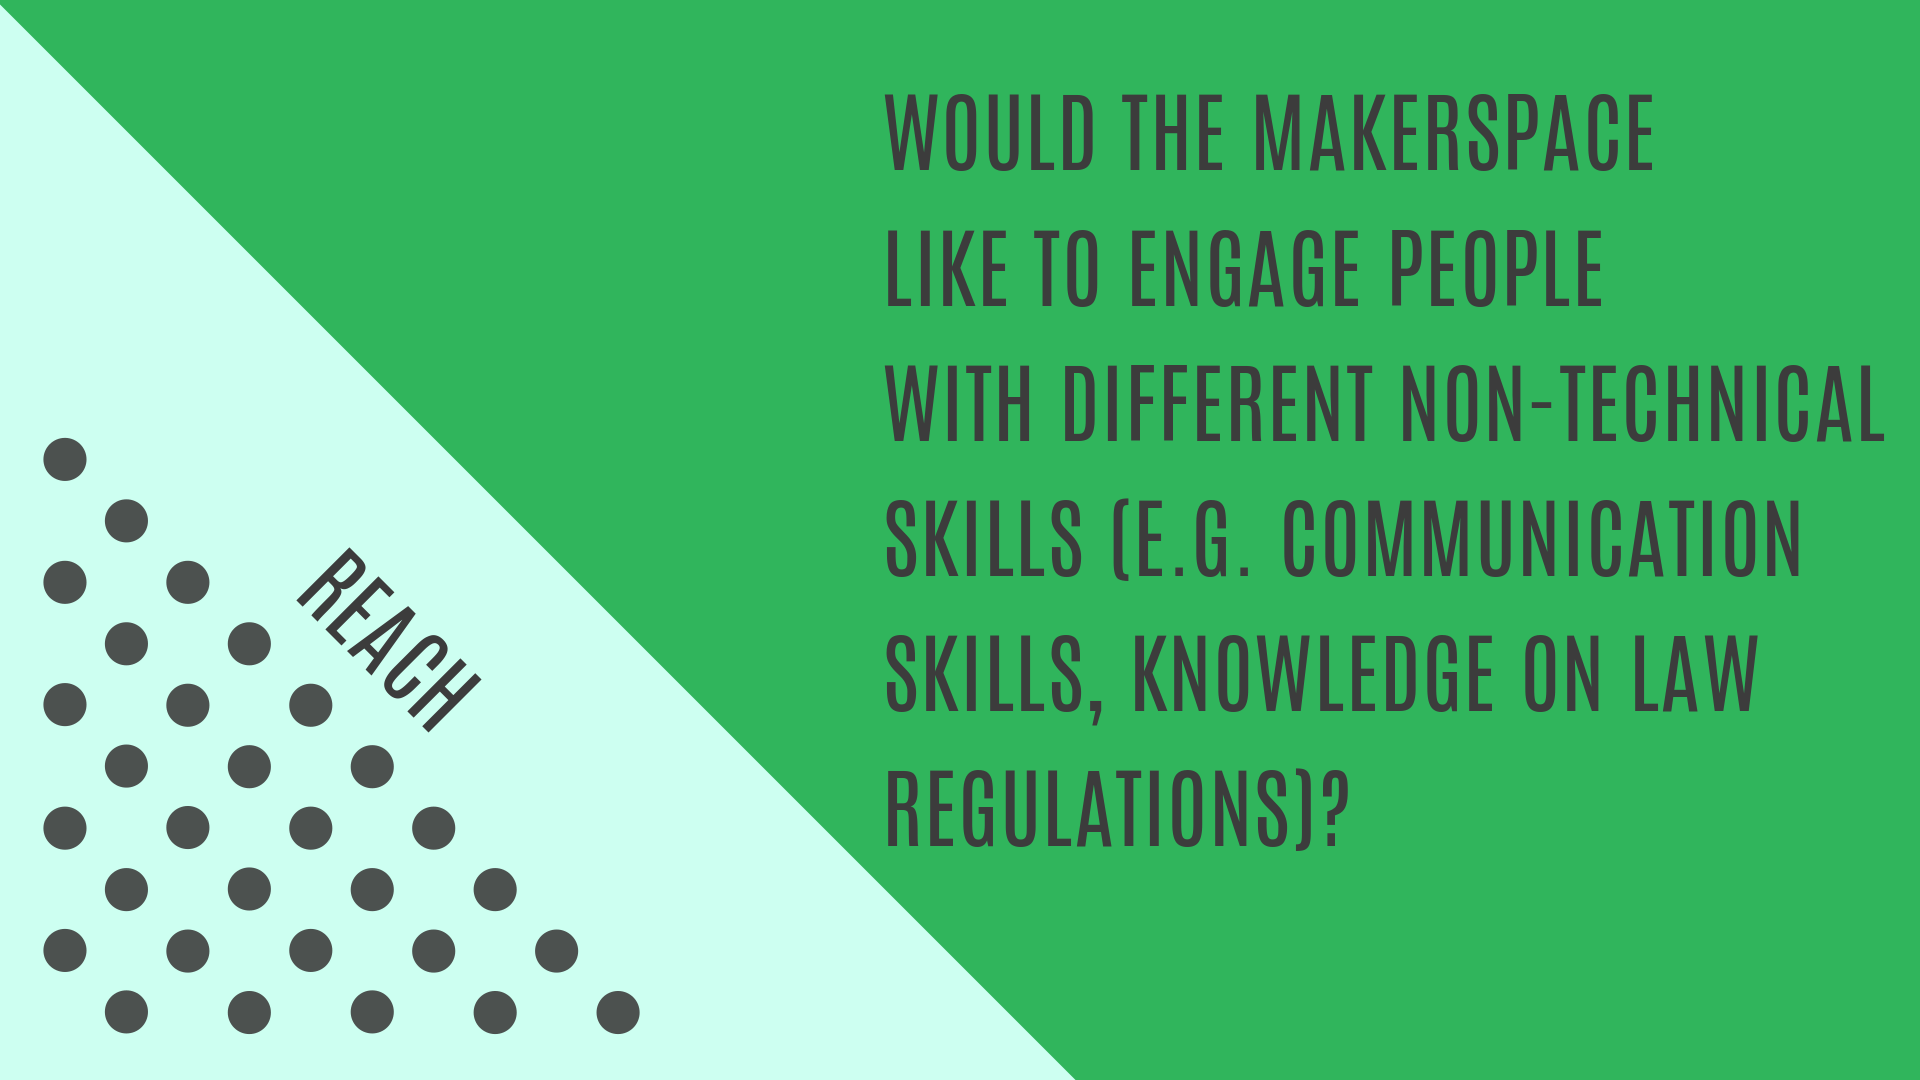


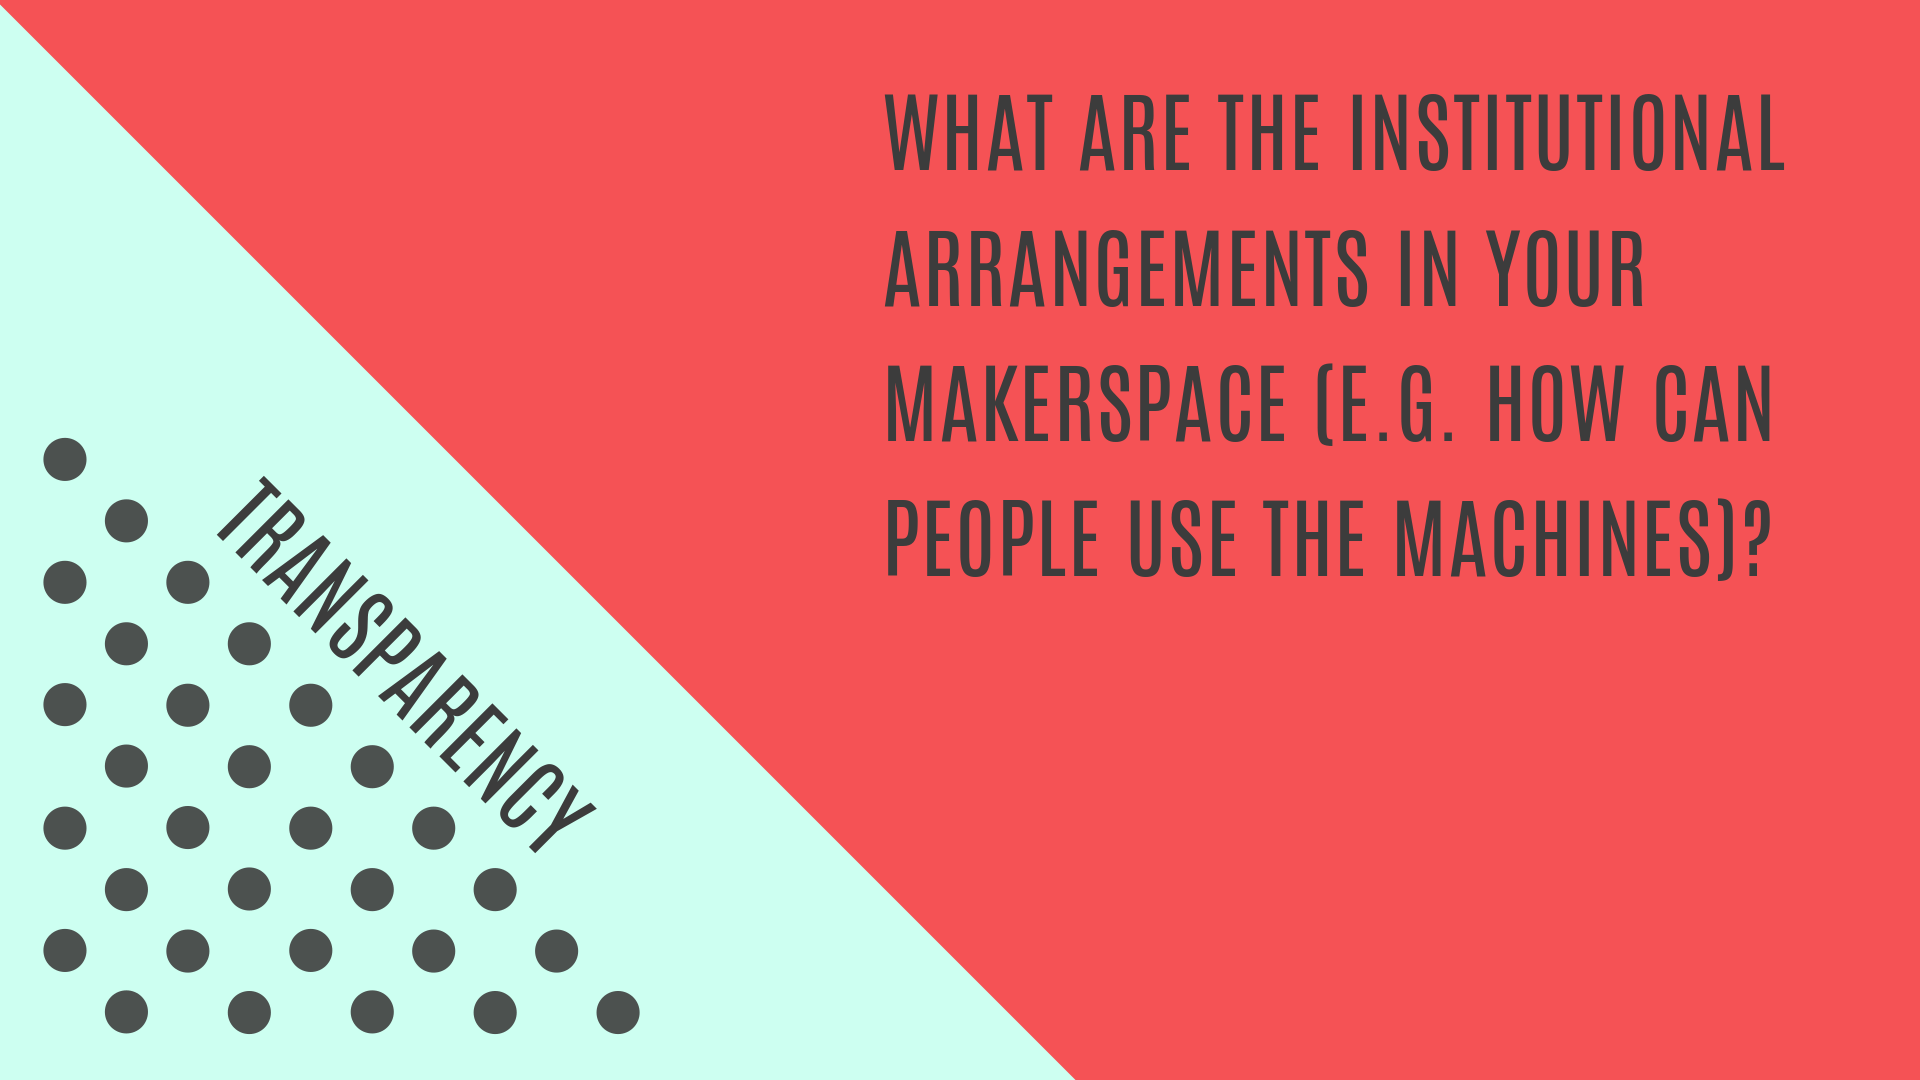

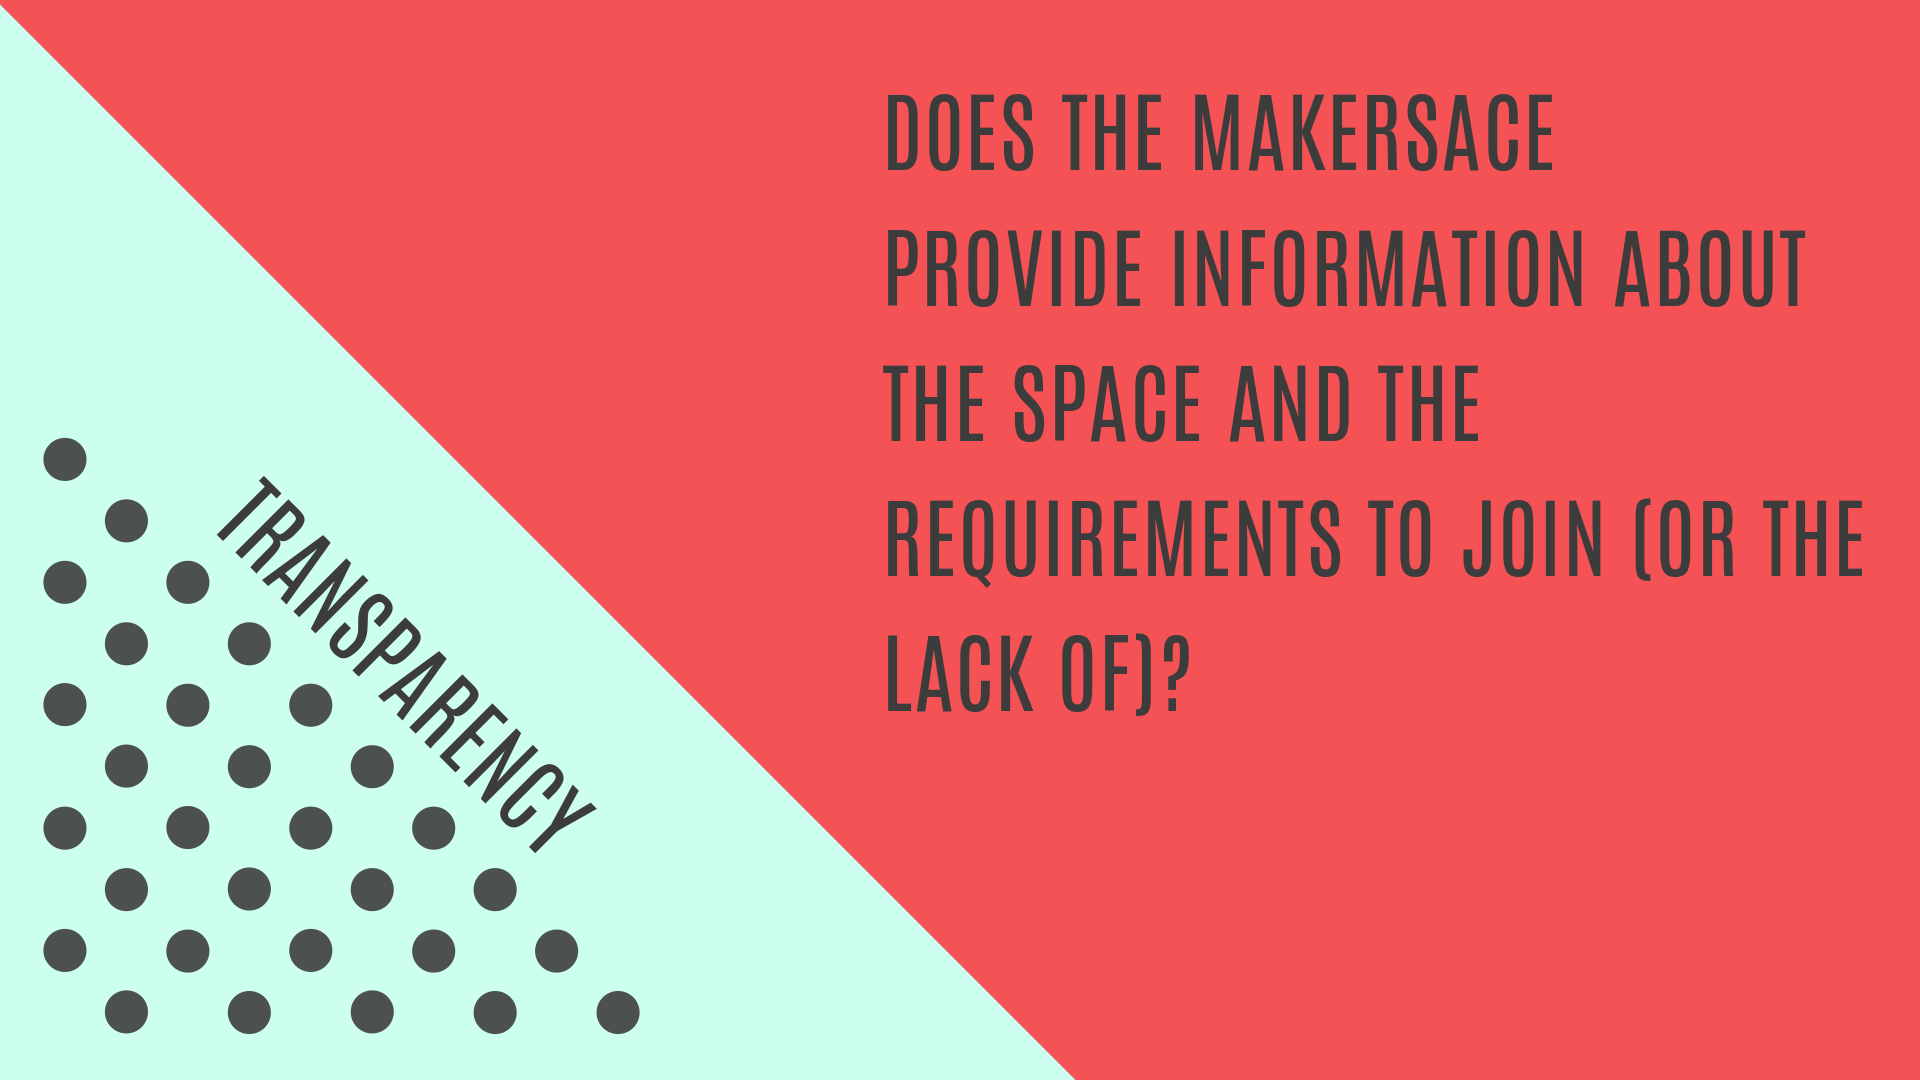


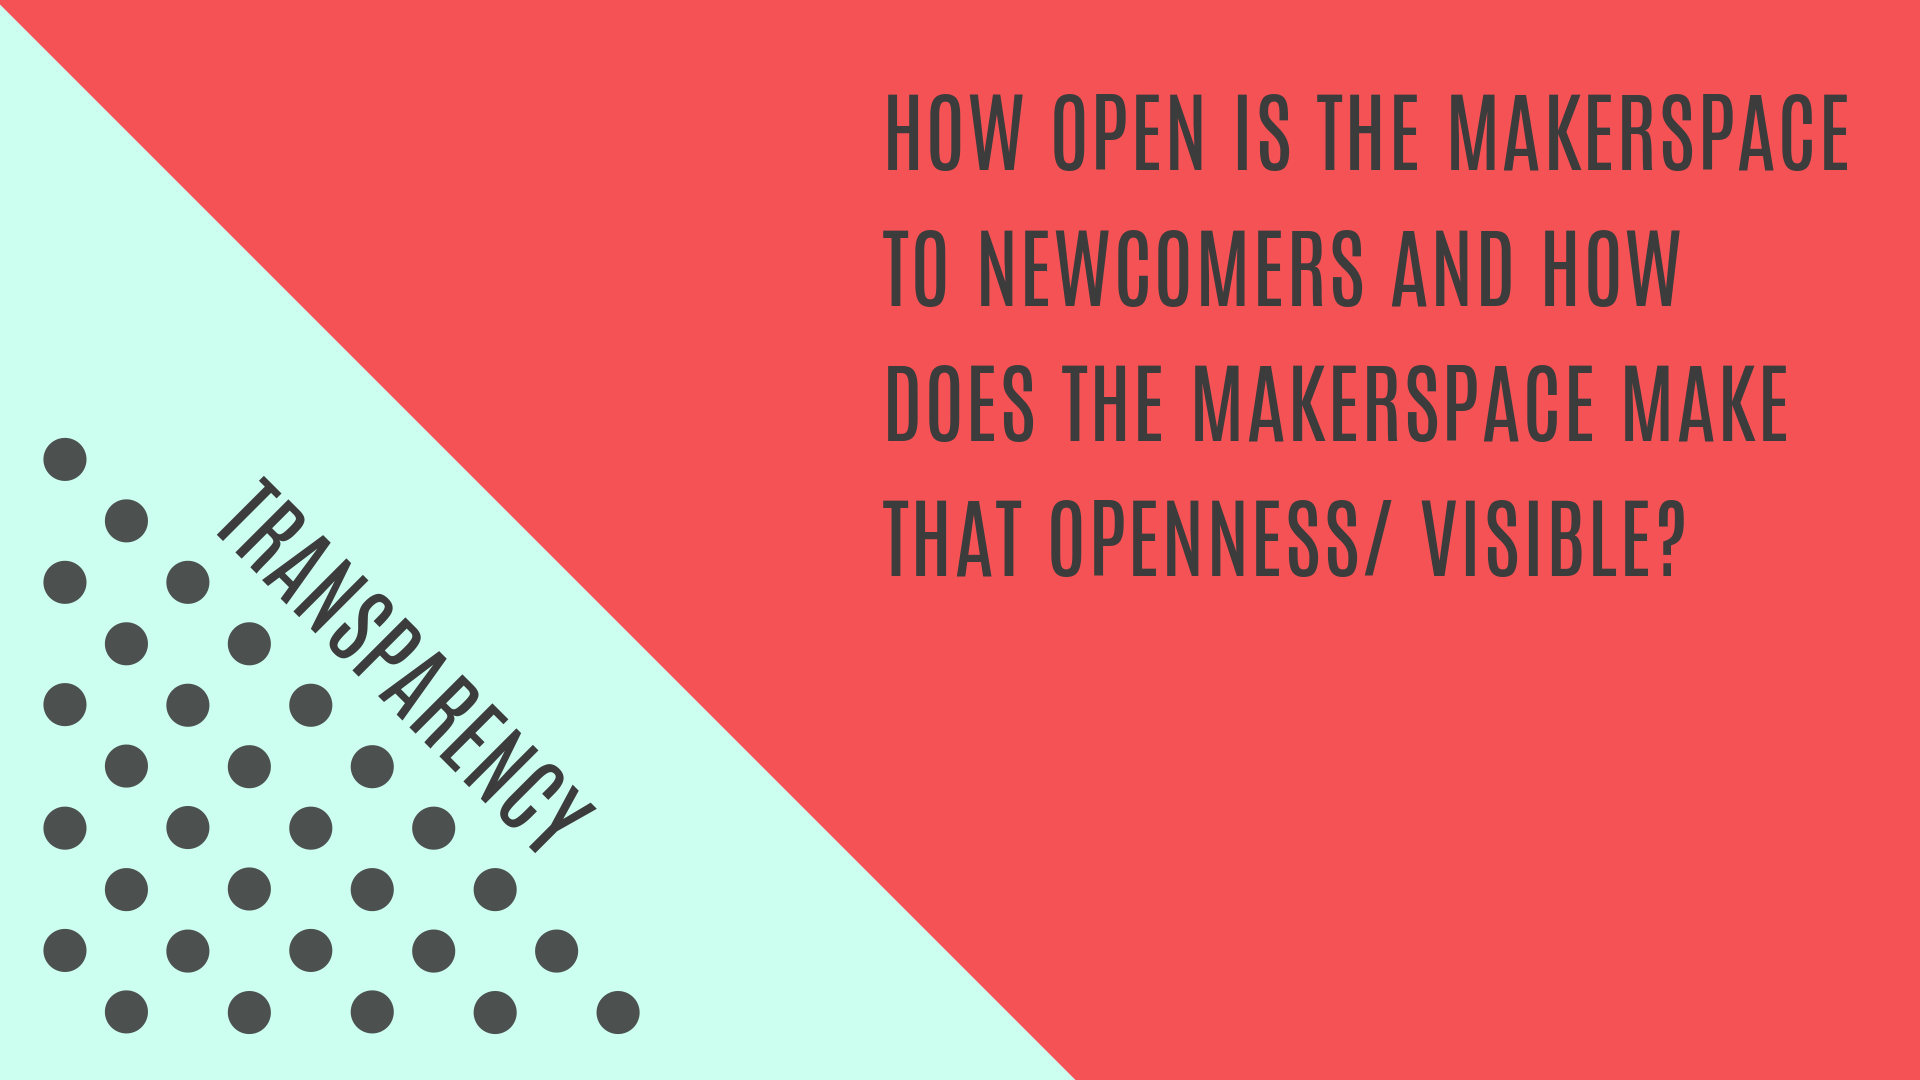

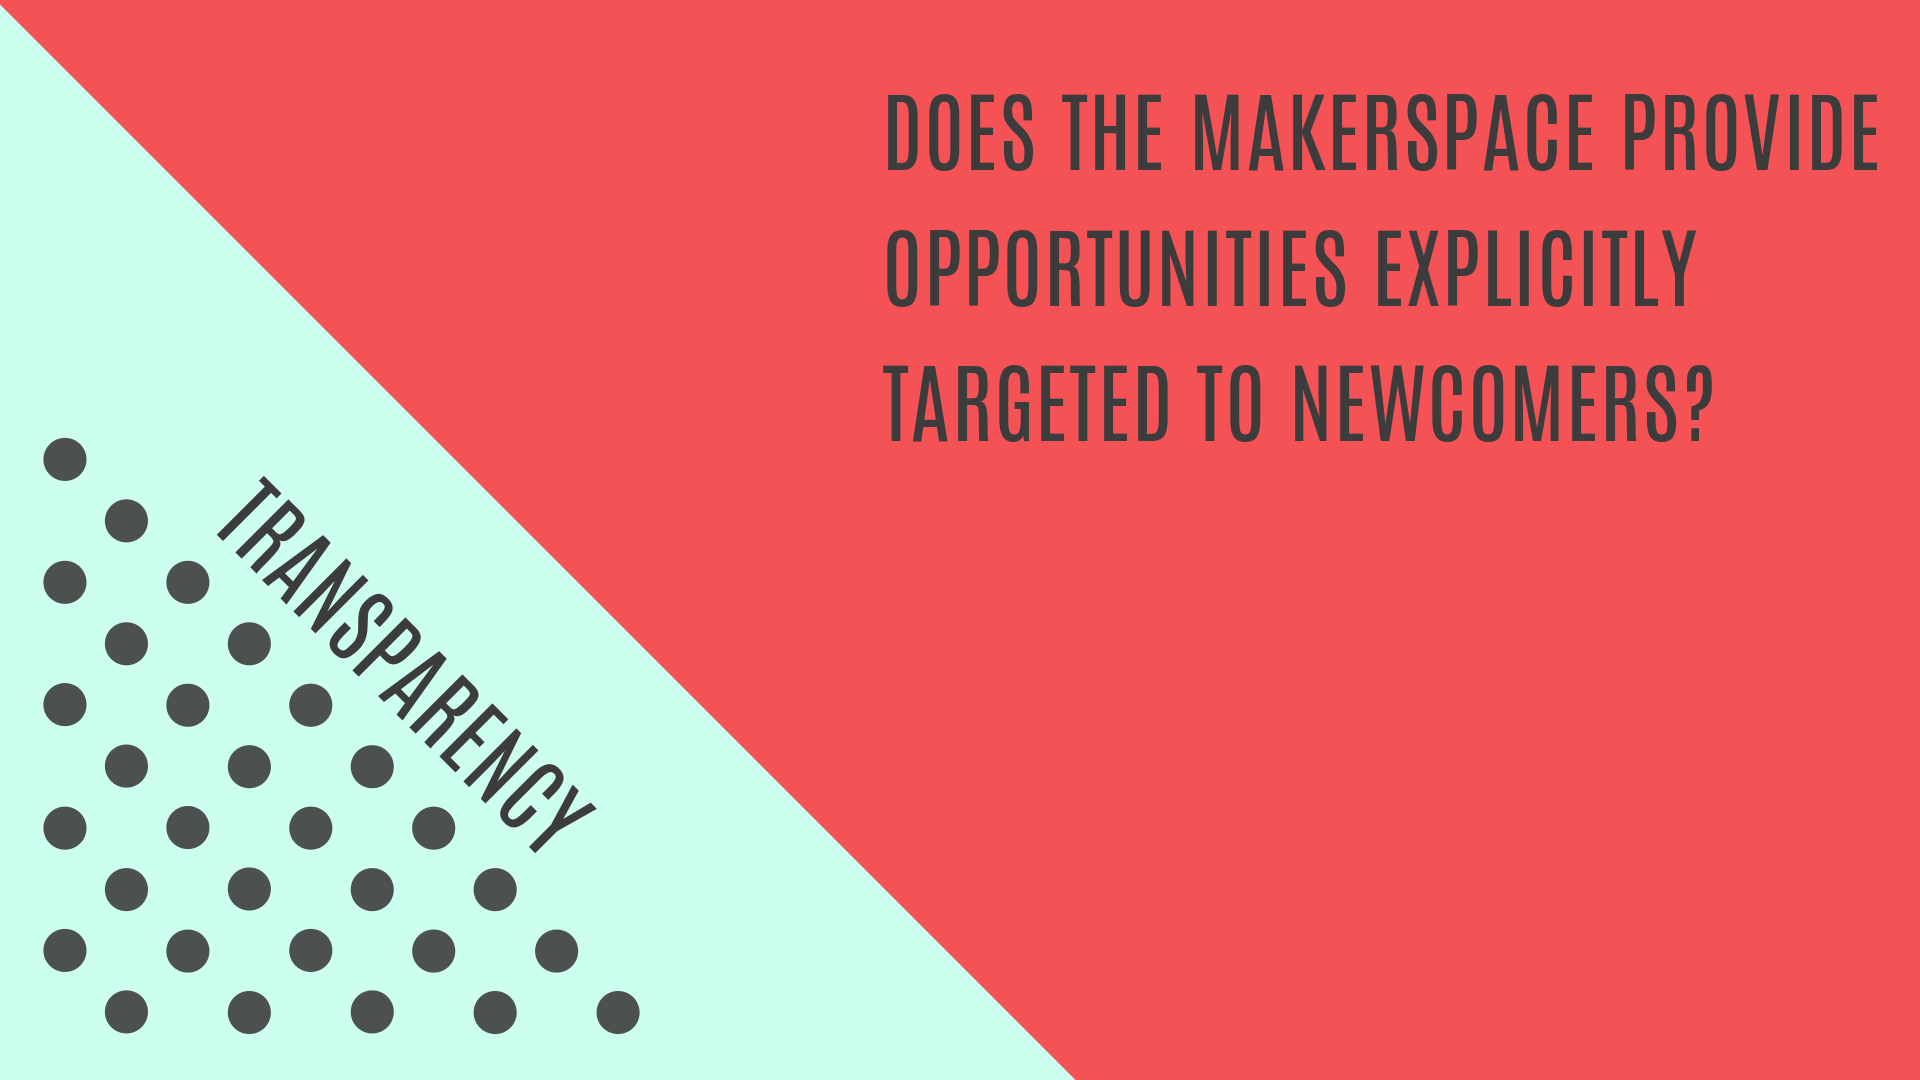


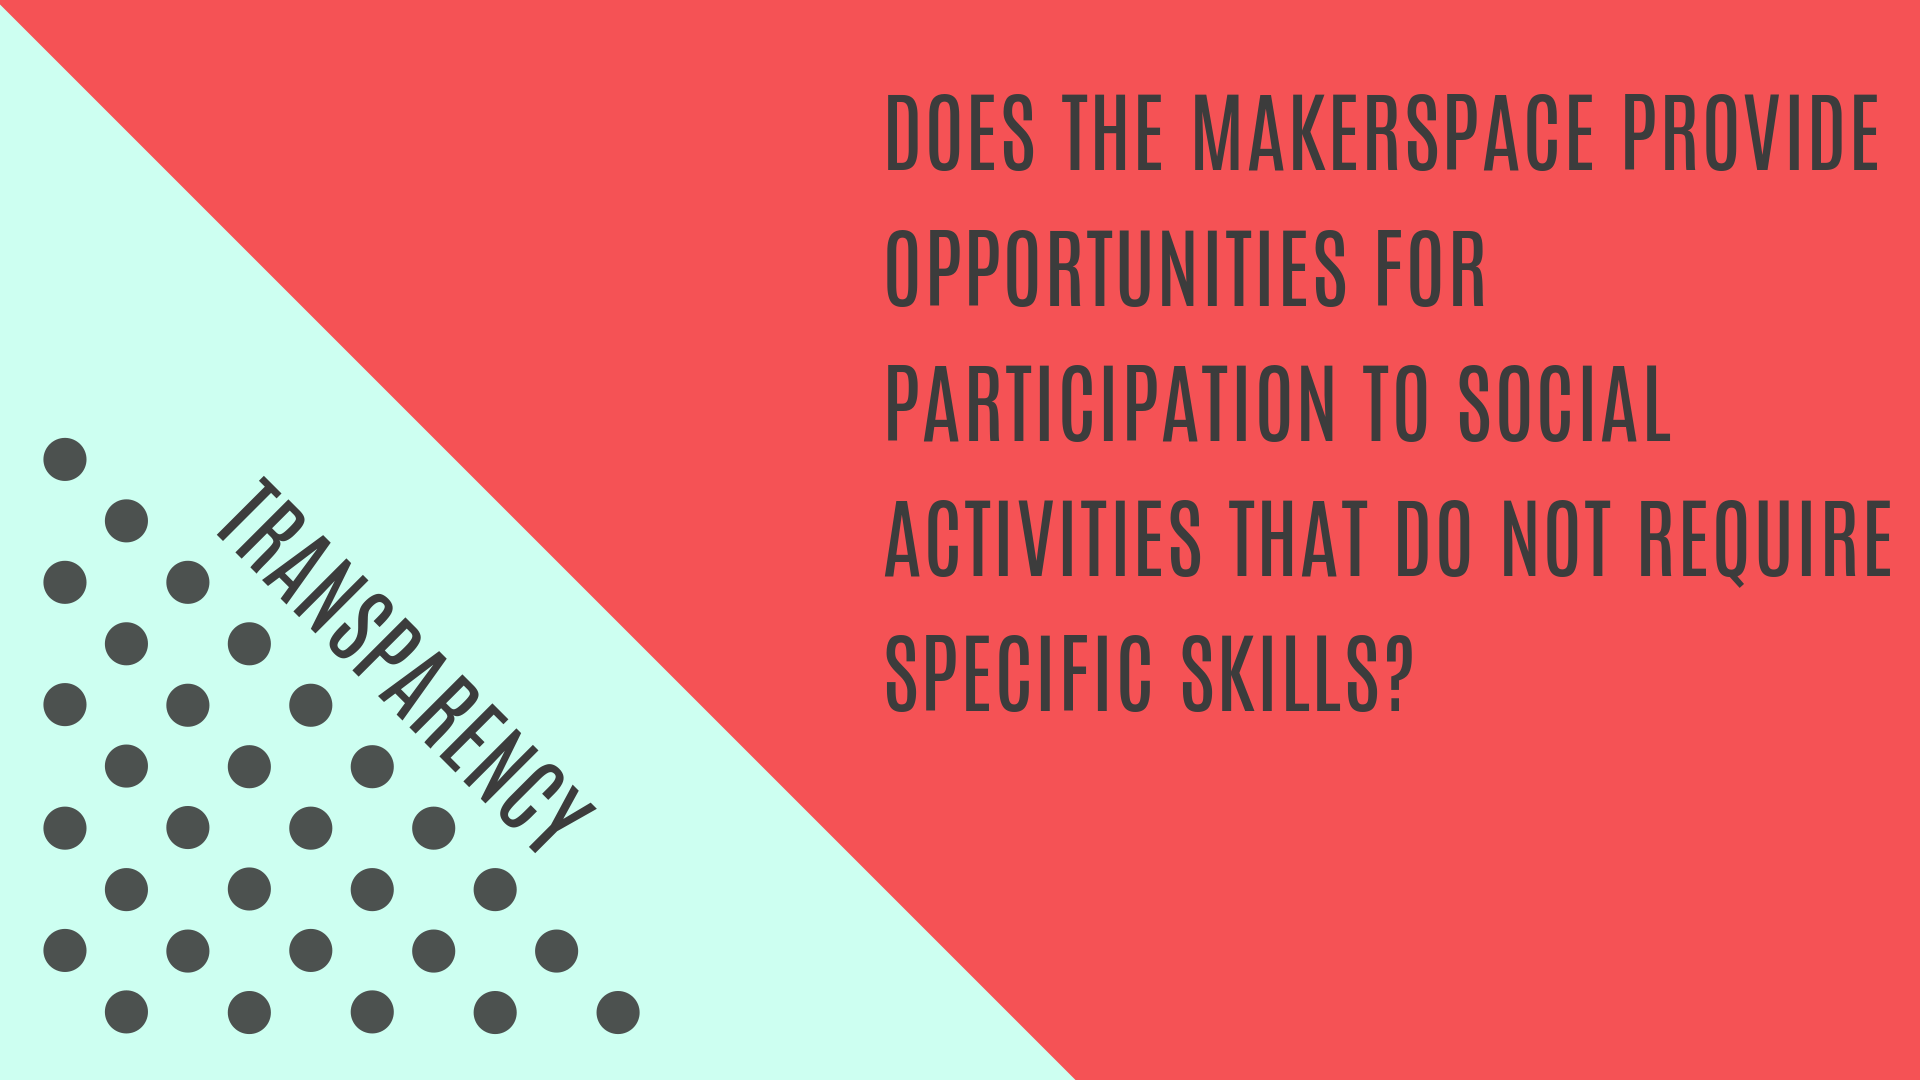

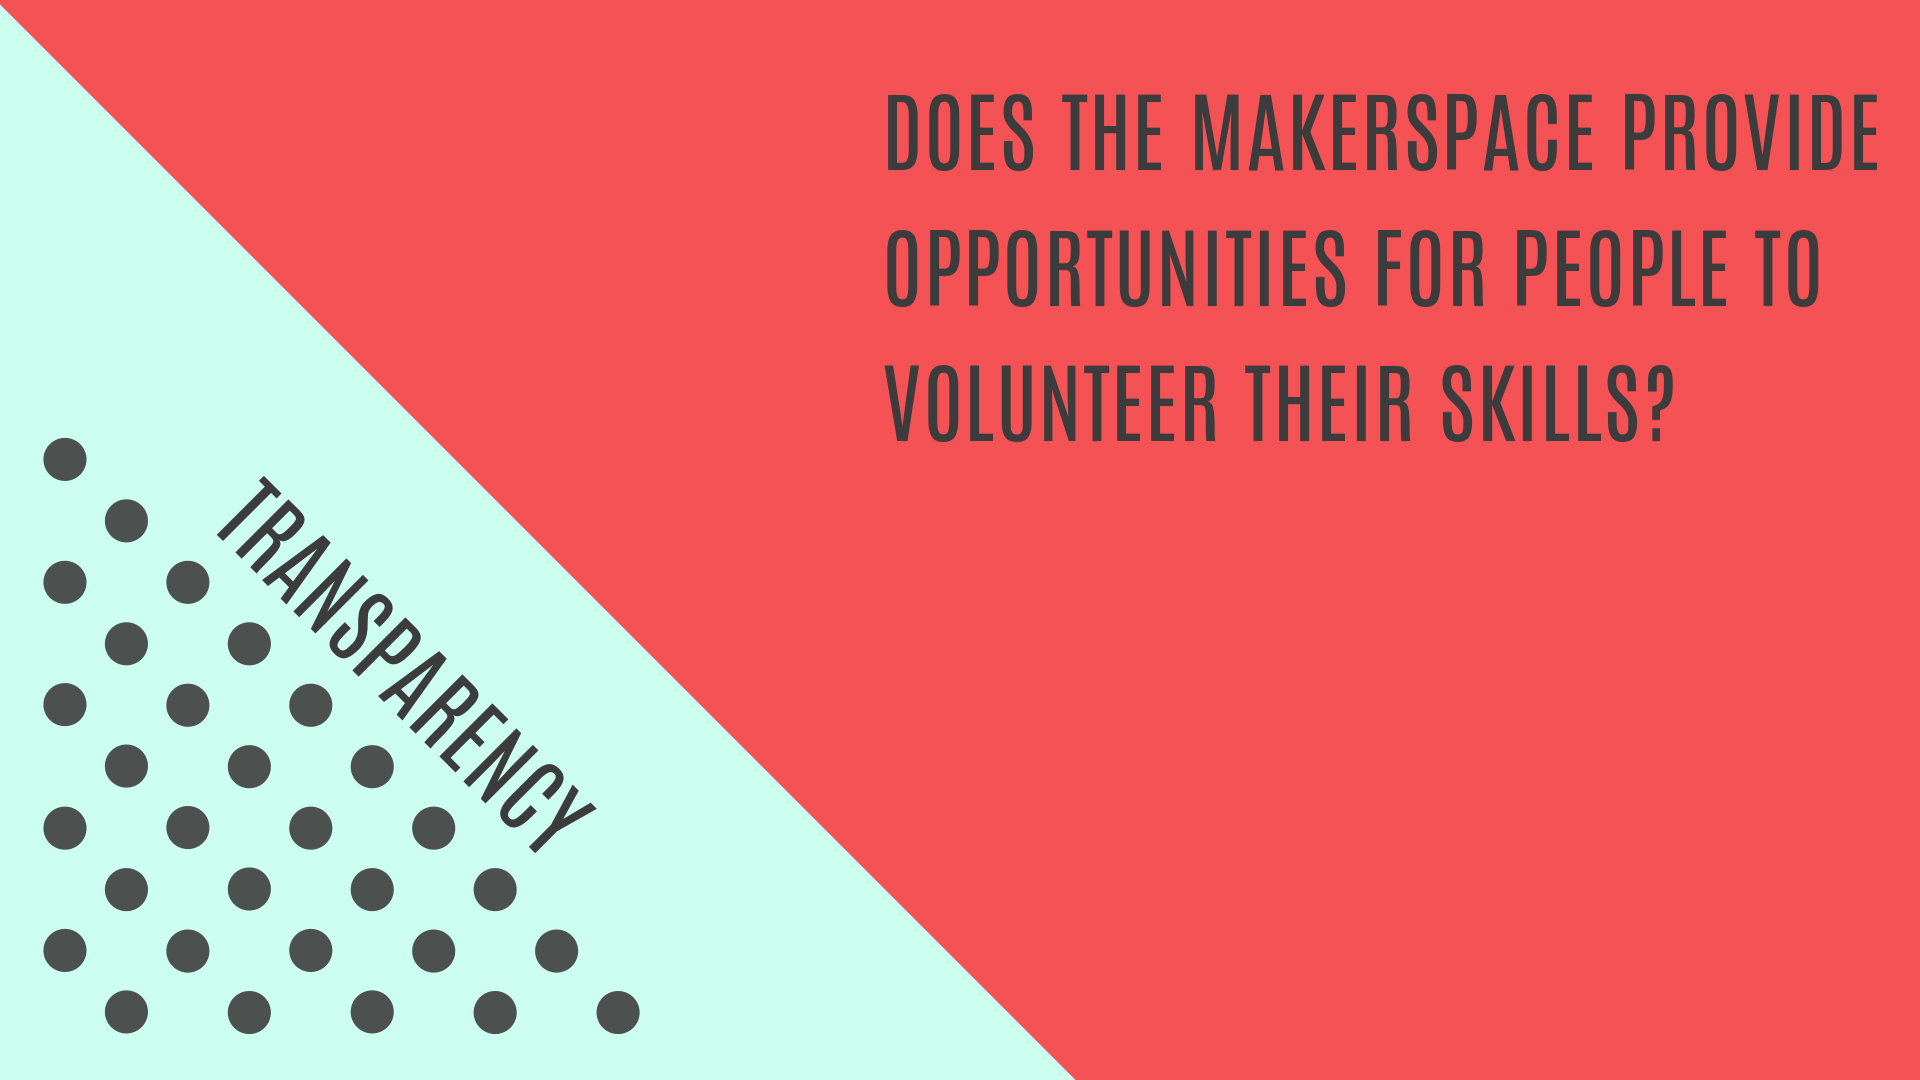


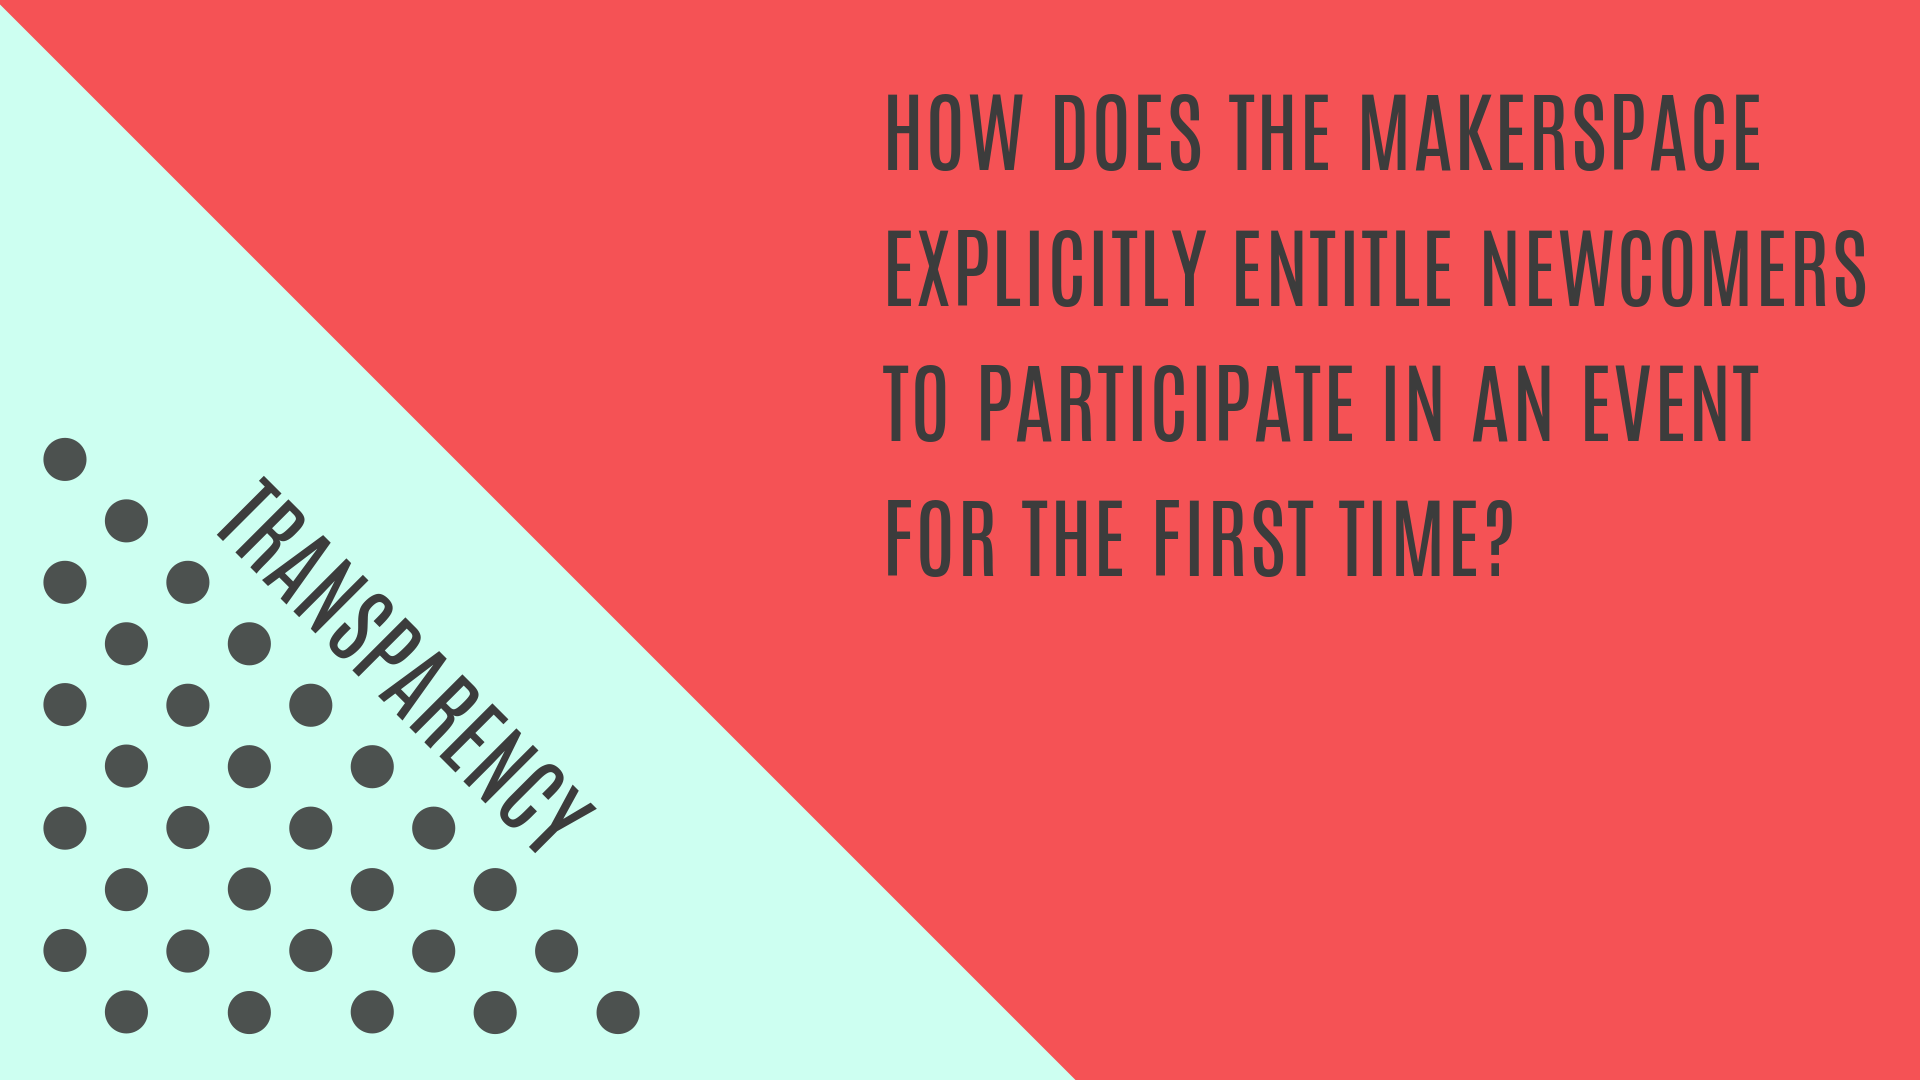

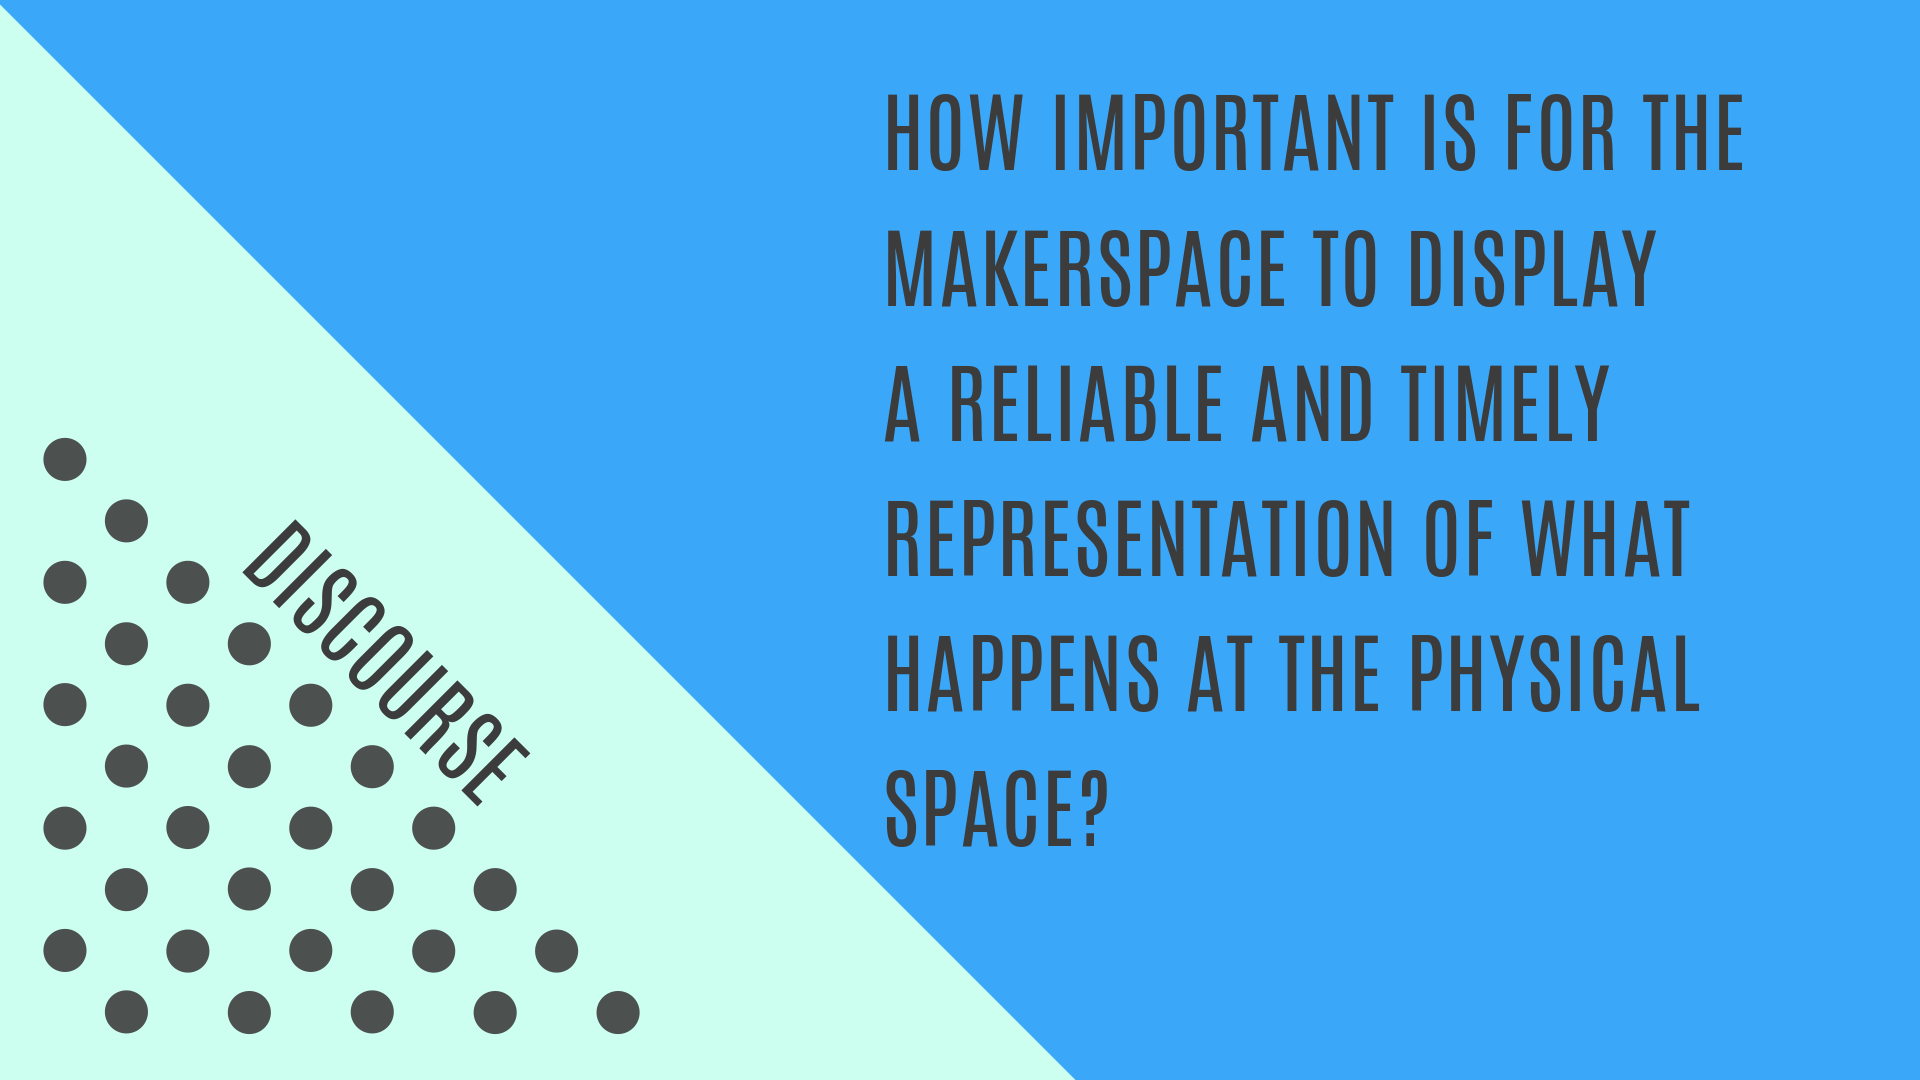


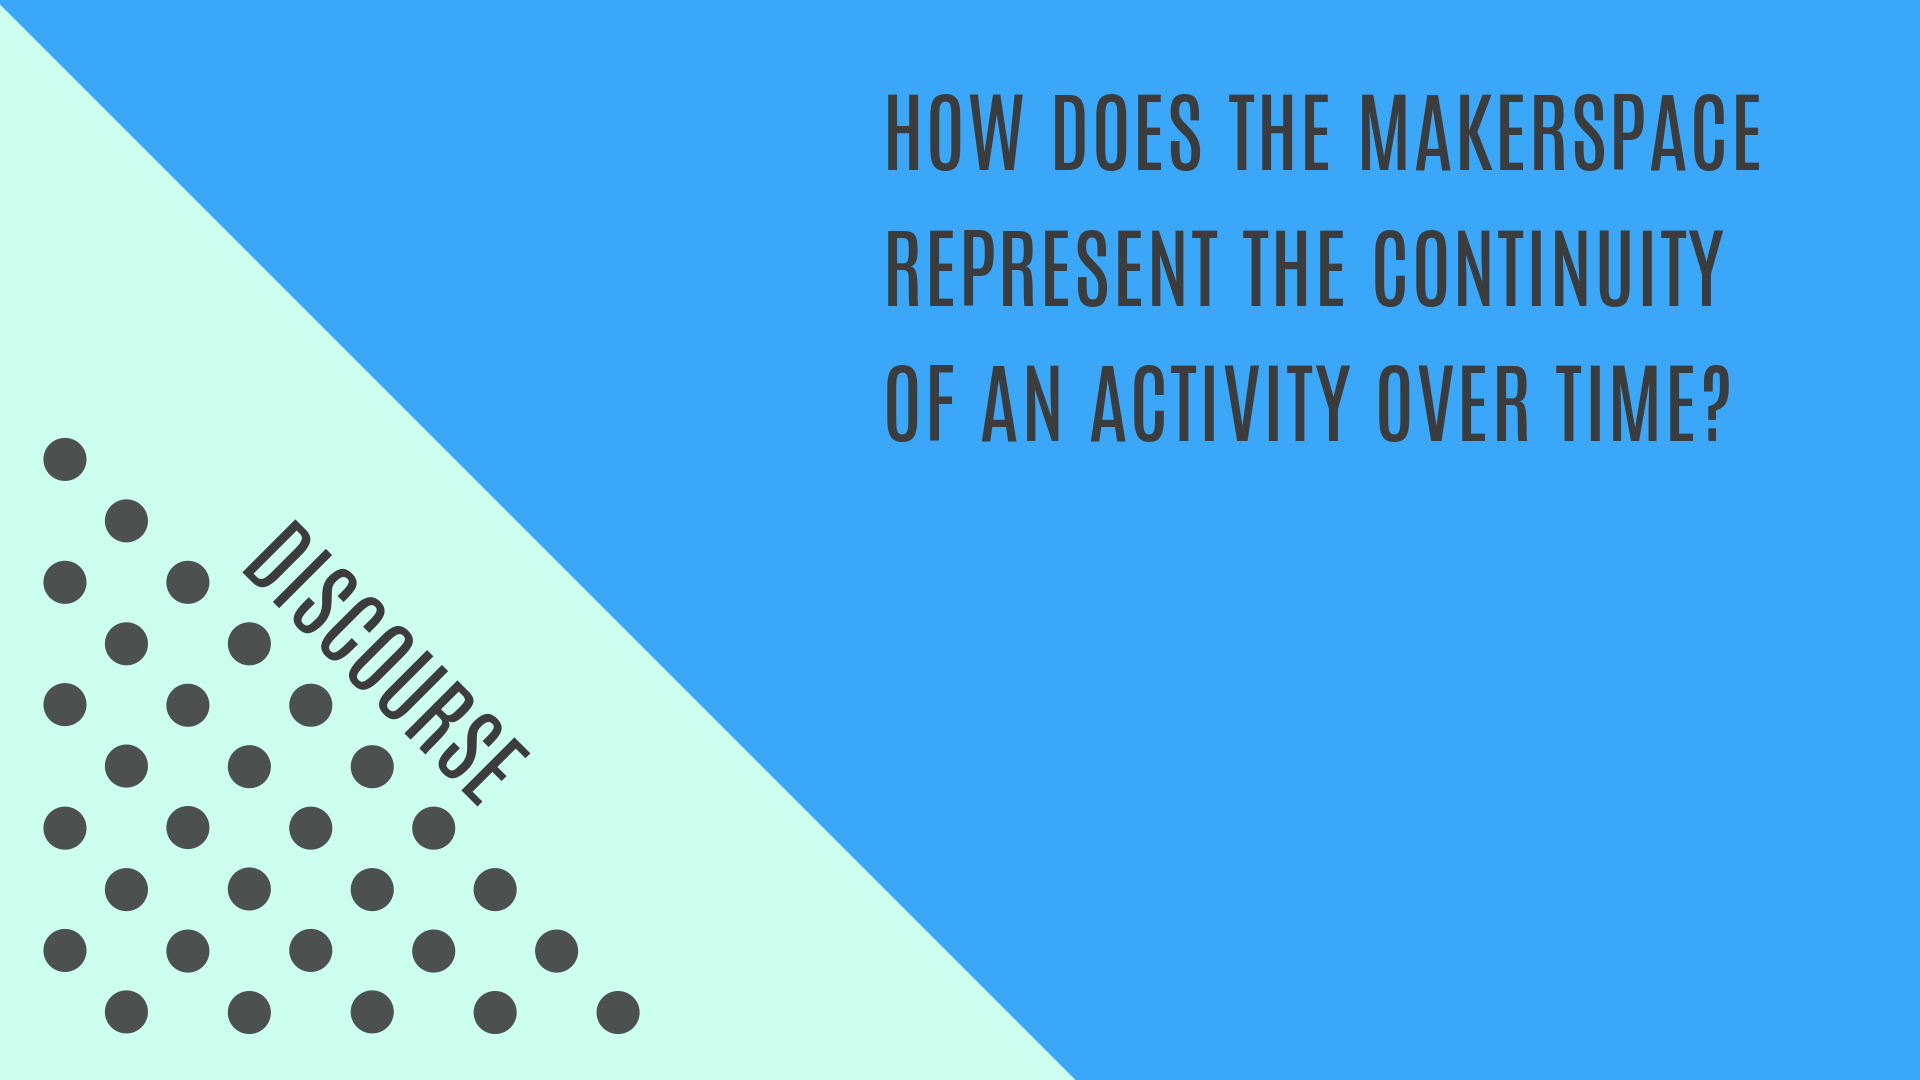

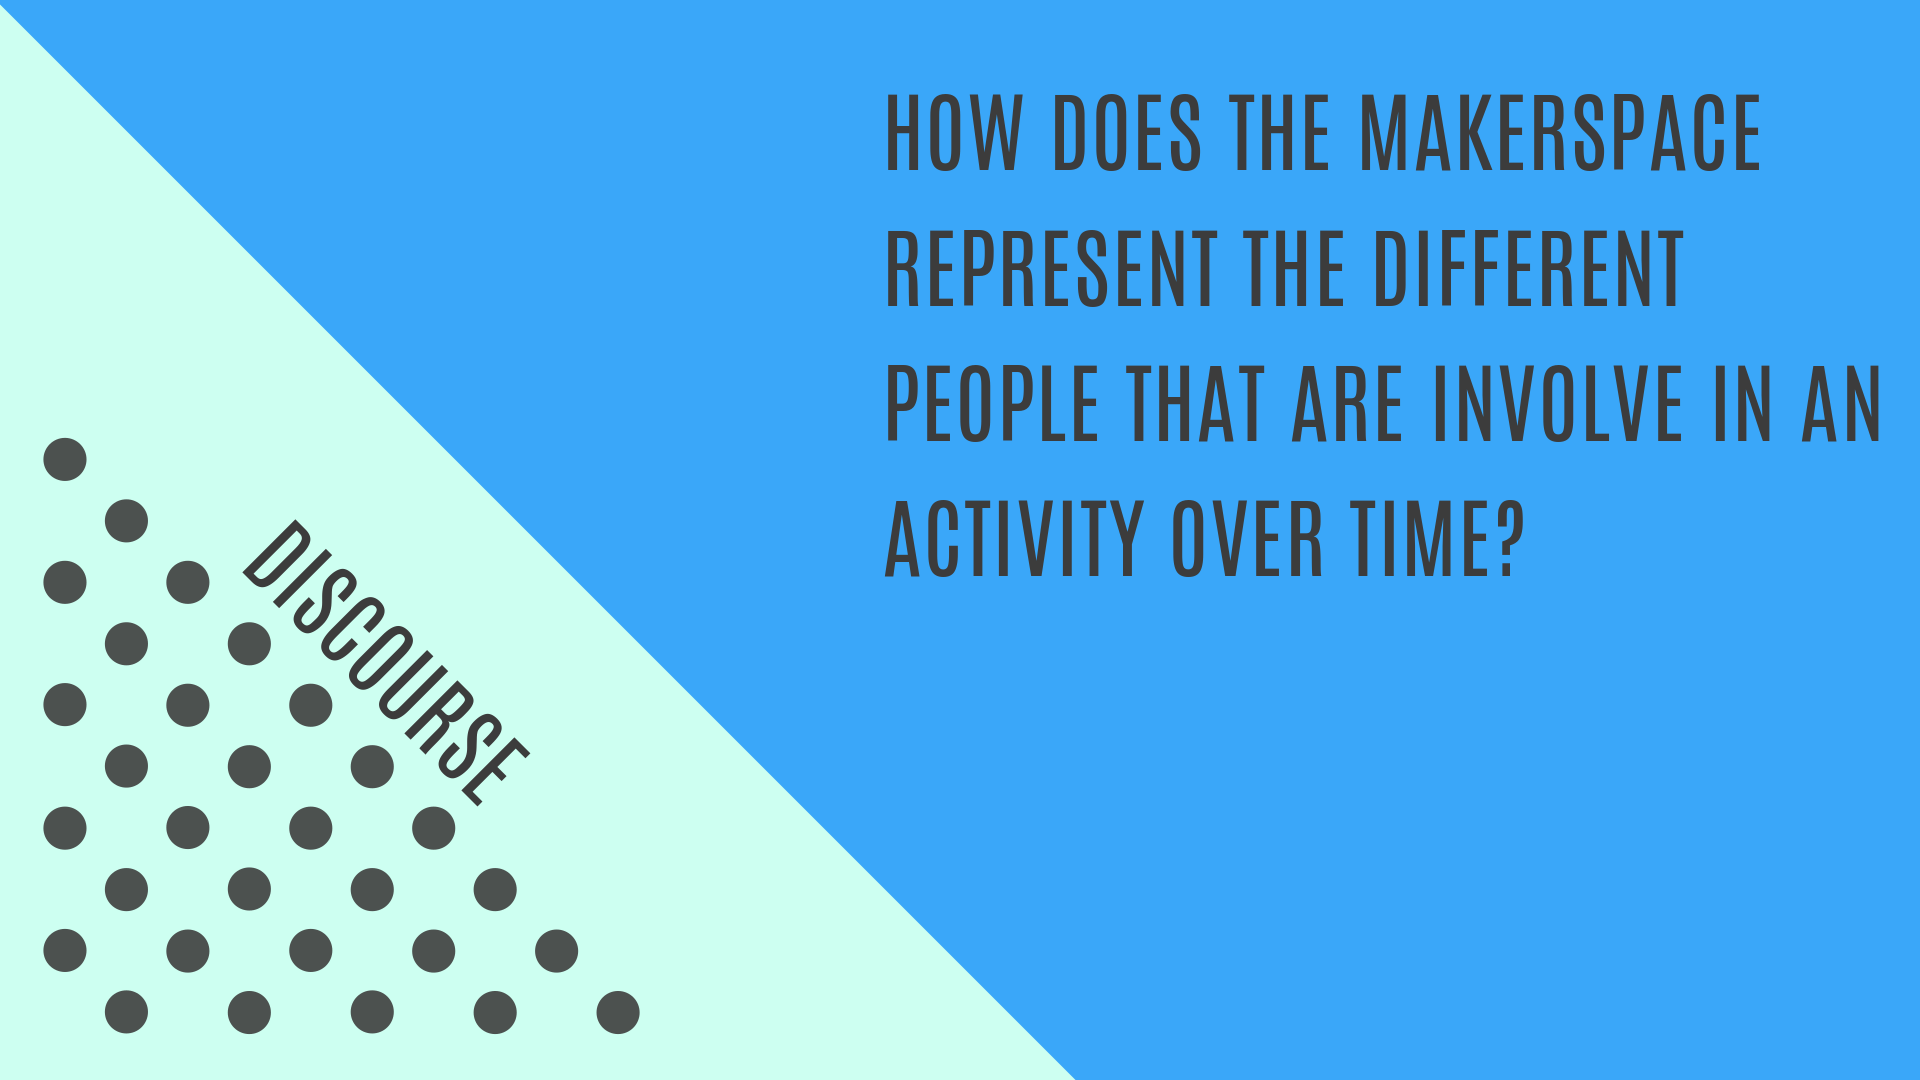


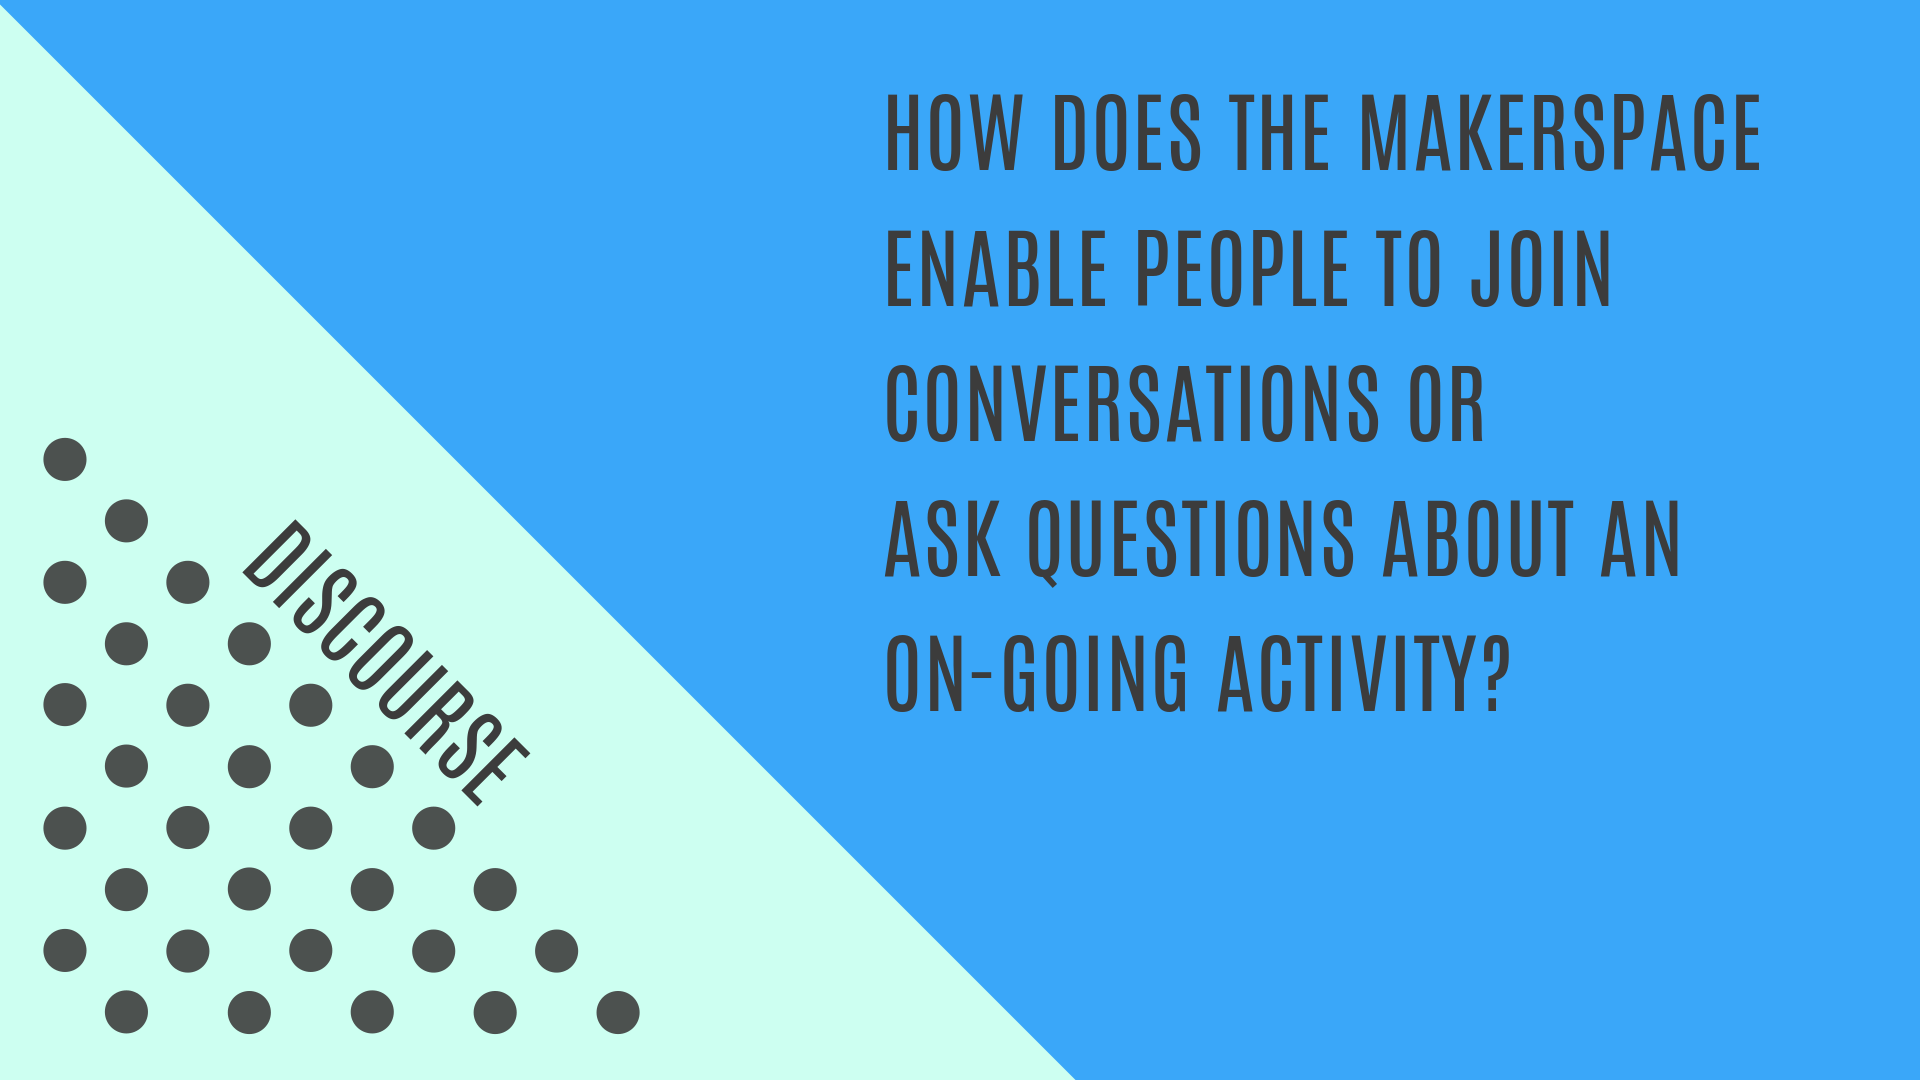

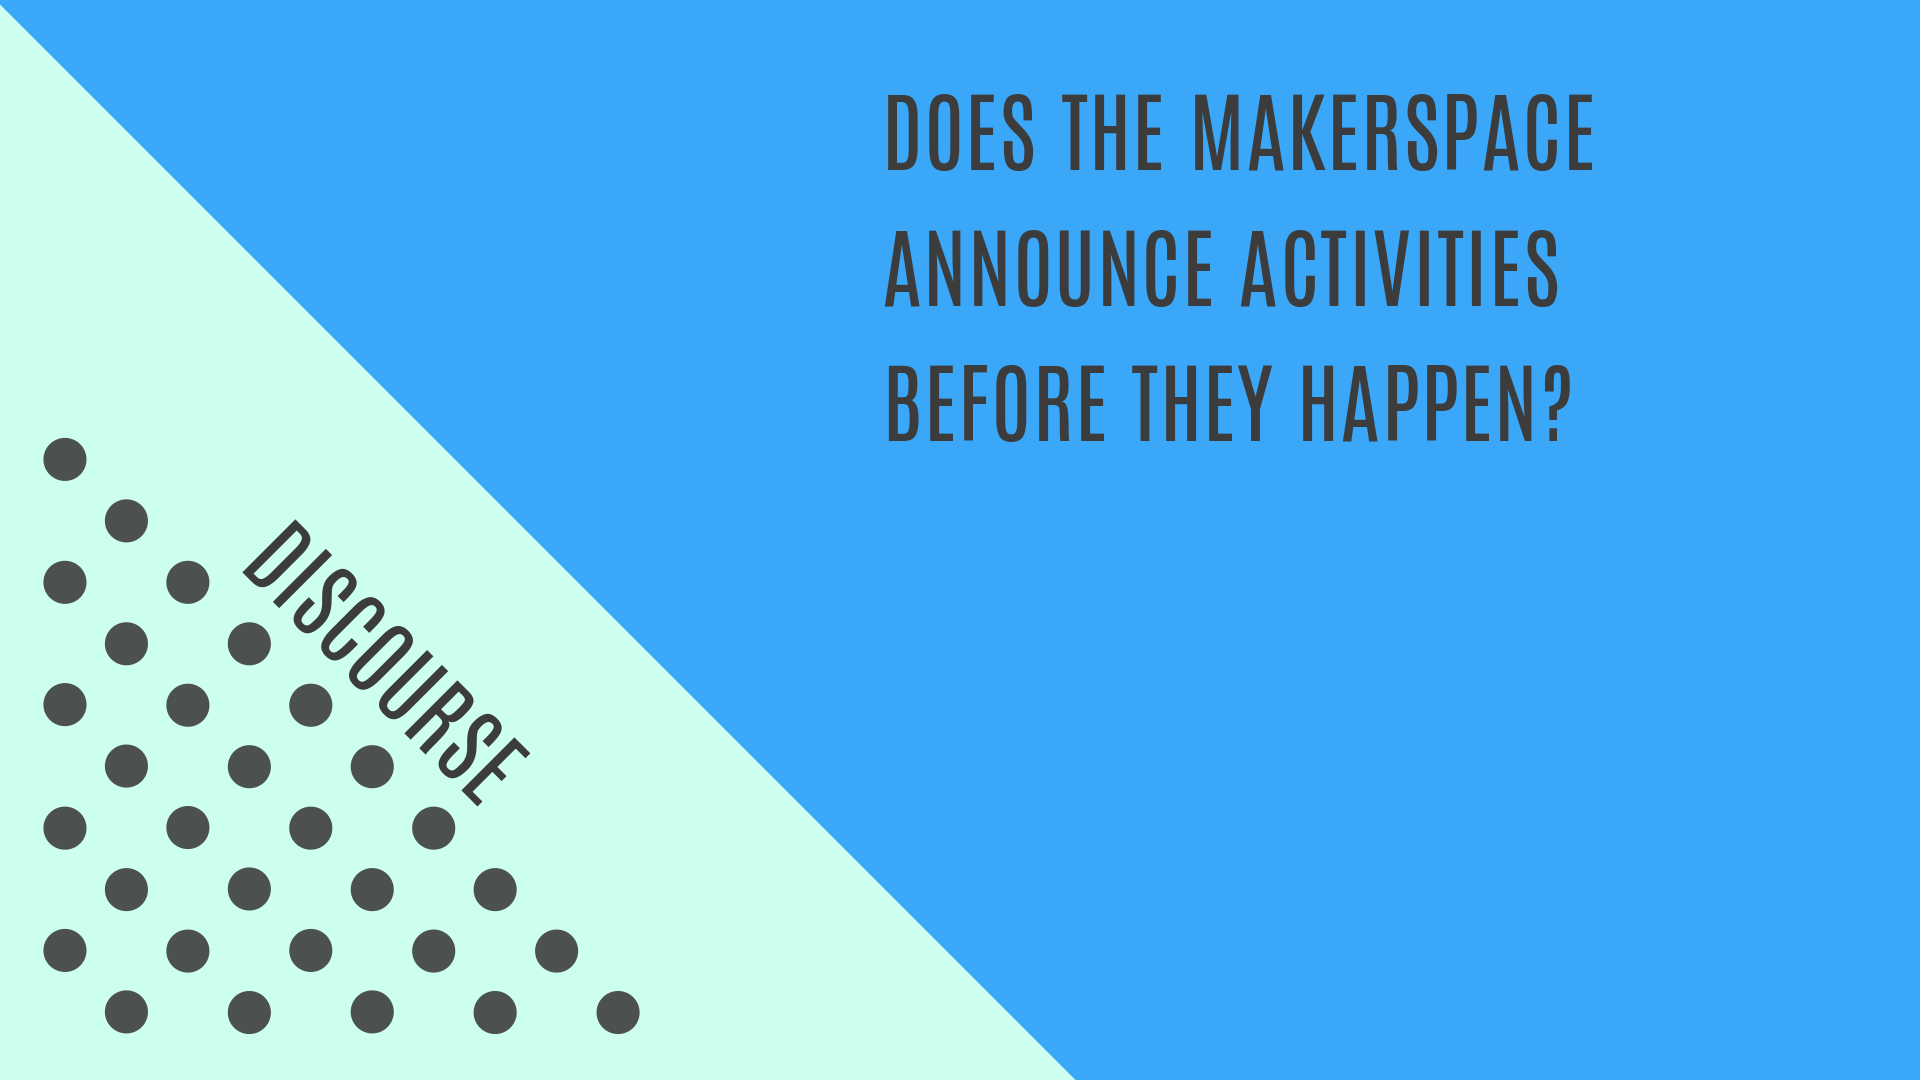


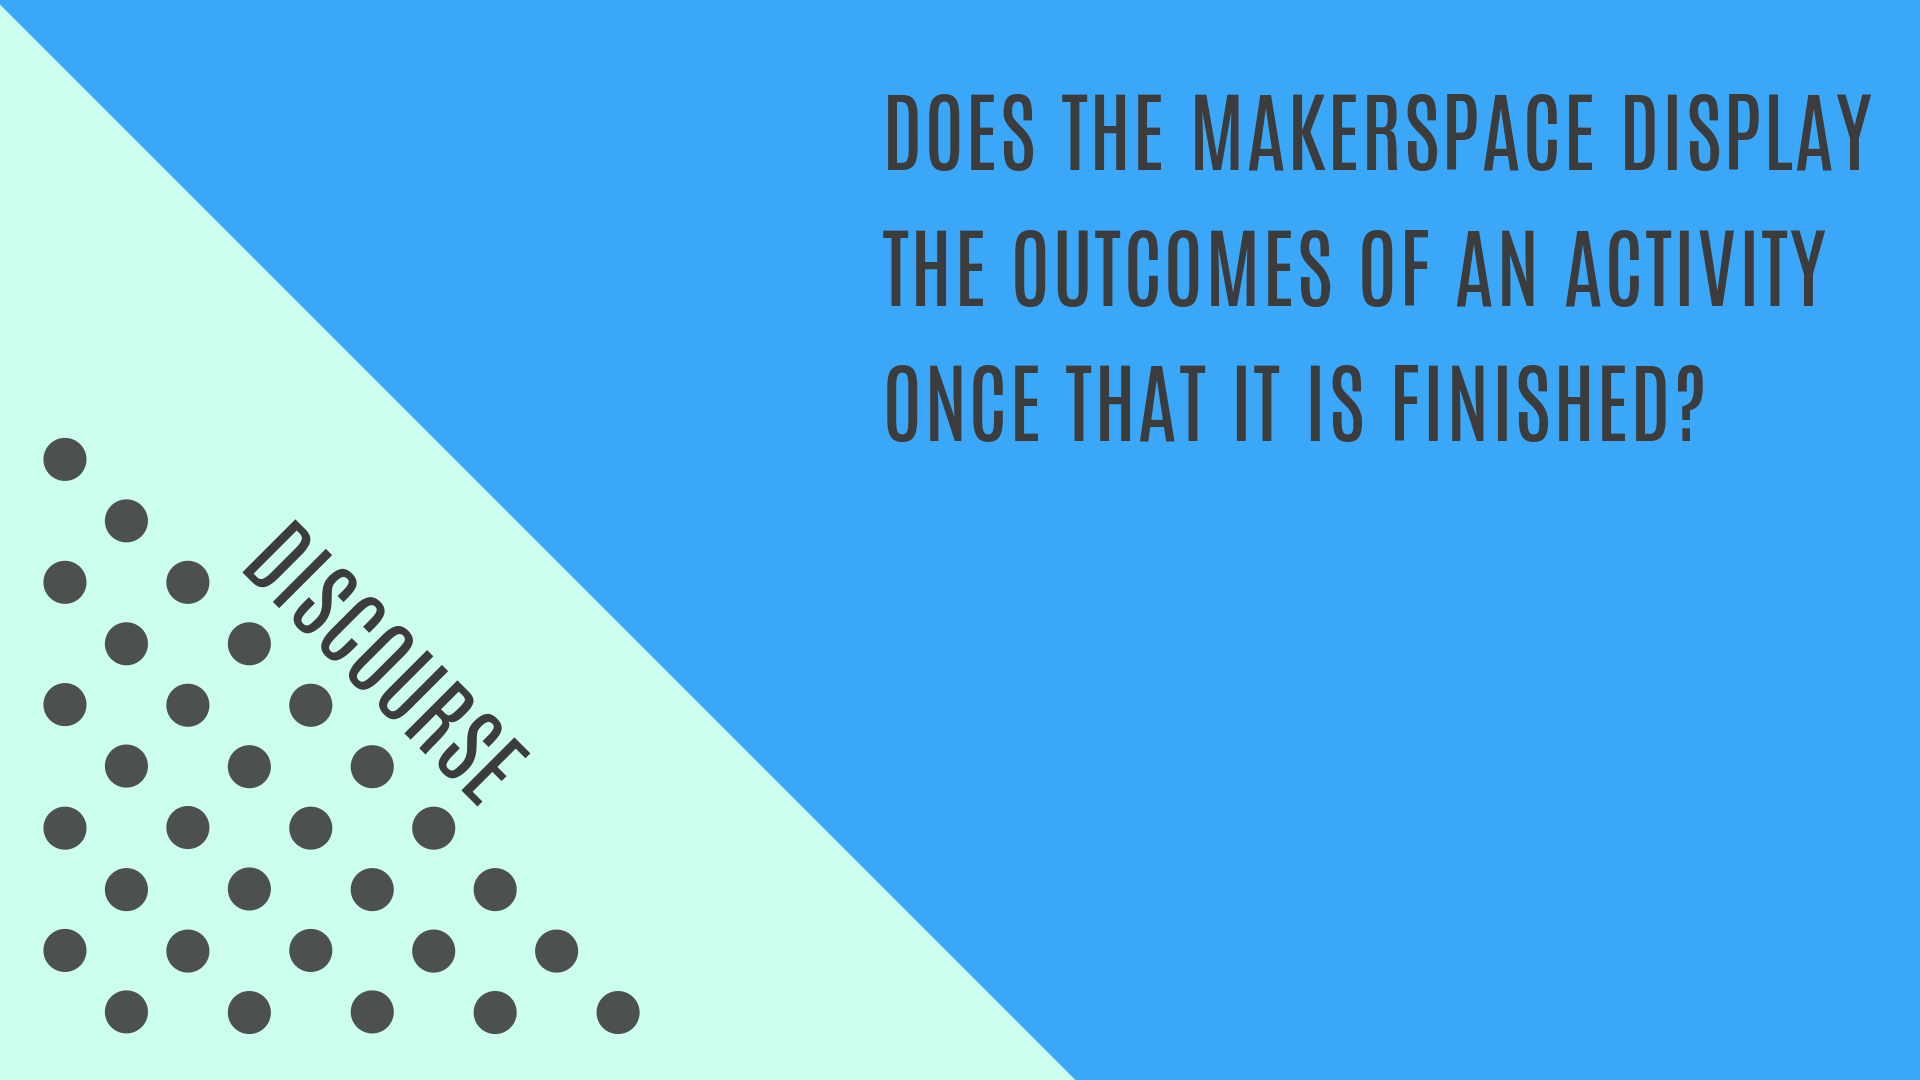

Supplement: Supplementary file 1 [file 14354174]
